1 **Targeting *de novo* lipogenesis and the Lands cycle induces ferroptosis in KRAS-**  
2 **mutant lung cancer**

3 Caterina Bartolacci<sup>1,14</sup>, Cristina Andreani<sup>1,14</sup>, Gonçalo Vias Do Vale<sup>2</sup>, Stefano Berto<sup>3</sup>, Margherita  
4 Melegari<sup>1</sup>, Anna C. Crouch<sup>4</sup>, Dodge L. Baluya<sup>5</sup>, George Kemble<sup>6</sup>, Kurt Hodges<sup>7</sup>, Jacqueline  
5 Starrett<sup>8</sup>, Katerina Politi<sup>8</sup>, Sandra L. Starnes<sup>9</sup>, Daniele Lorenzini<sup>10</sup>, Maria Gabriela Raso<sup>11</sup>, Luisa  
6 Solis Soto<sup>11</sup>, Carmen Behrens<sup>12</sup>, Humam Kadara<sup>11</sup>, Boning Gao<sup>13</sup>, David Gerber<sup>13</sup>, Ignacio I.  
7 Wistuba<sup>11</sup>, John D. Minna<sup>13</sup>, Jeffrey McDonald<sup>2</sup>, and Pier Paolo Scaglioni<sup>1,\*</sup>

8 **Affiliations:**

9 <sup>1</sup> Department of Internal Medicine, University of Cincinnati College of Medicine, Cincinnati, OH  
10 45219, USA.

11 <sup>2</sup> McDermott Center for Human Growth and Development, The University of Texas Southwestern  
12 Medical Center, Dallas, TX 75390, USA.

13 <sup>3</sup> Department of Neuroscience, The University of Texas Southwestern Medical Center, Dallas, TX  
14 75390, USA

15 <sup>4</sup> Department of Interventional Radiology, The University of Texas MD Anderson Cancer Center

16 <sup>5</sup> Tissue Imaging and Proteomics Laboratory, Washington State University, Pullman, WA 99164.

17 <sup>6</sup> Sagimet Biosciences, San Mateo, CA 94402.

18 <sup>7</sup> Department of Pathology, University of Cincinnati College of Medicine, Cincinnati, OH 45219,  
19 USA.

20 <sup>8</sup> Yale Cancer Center, Yale School of Medicine, New Haven, Connecticut.

21 <sup>9</sup> Department of Surgery, Division of Thoracic Surgery, University of Cincinnati College of  
22 Medicine, Cincinnati, OH 45219, USA

23 <sup>10</sup> Department of Pathology, Fondazione IRCCS Istituto Nazionale dei Tumori di Milano, via  
24 Venezian 1, 20133 Milan, Italy

25 <sup>11</sup> Department of Translational Molecular Pathology,

26 <sup>12</sup> Department of Thoracic H&N Med Oncology, The University of Texas MD Anderson Cancer  
27 Center.

28 <sup>13</sup> Hamon Center for Therapeutic Oncology Research, The University of Texas Southwestern Medical  
29 Center, Dallas, TX 75390, USA.

30 <sup>14</sup> These authors contributed equally to this manuscript.

31 \* Corresponding author: Pier Paolo Scaglioni, The Vontz Center for Molecular Studies, 3125 Eden  
32 Avenue, Rm. 3118, Cincinnati, OH 45219-2293. Email: [Scaglioni@ucmail.uc.edu](mailto:Scaglioni@ucmail.uc.edu) Phone: 513-558-  
33 2115; FAX: 513-558-2125.

34 **Running title:** Mutant KRAS lung cancer depends on FASN and the Lands cycle

35 **Conflict of interest statement:** The authors declare no potential conflicts of interest.

36

## 1 **Abstract**

2 Mutant *KRAS* (KM) is the most common oncogene in lung cancer (LC). KM regulates several  
3 metabolic networks, but their role in tumorigenesis is still not sufficiently characterized to be  
4 exploited in cancer therapy. To identify metabolic networks specifically deregulated in KMLC,  
5 we characterized the lipidome of genetically engineered LC mice, cell lines, patient derived  
6 xenografts and primary human samples. We also determined that KMLC, but not EGFR-mutant  
7 (EGFR-MUT) LC, is enriched in triacylglycerides (TAG) and phosphatidylcholines (PC). We also  
8 found that KM upregulates fatty acid synthase (FASN), a rate-limiting enzyme in fatty acid (FA)  
9 synthesis promoting the synthesis of palmitate and PC. We determined that FASN is specifically  
10 required for the viability of KMLC, but not of LC harboring EGFR-MUT or wild type *KRAS*.  
11 Functional experiments revealed that FASN inhibition leads to ferroptosis, a reactive oxygen  
12 species (ROS)-and iron-dependent cell death. Consistently, lipidomic analysis demonstrated that  
13 FASN inhibition in KMLC leads to accumulation of PC with polyunsaturated FA (PUFA) chains,  
14 which are the substrate of ferroptosis. Integrating lipidomic, transcriptome and functional analyses,  
15 we demonstrated that FASN provides saturated (SFA) and monounsaturated FA (MUFA) that feed  
16 the Lands cycle, the main process remodeling oxidized phospholipids (PL), such as PC.  
17 Accordingly, either inhibition of FASN or suppression of the Lands cycle enzymes PLA2 and  
18 LPCAT3, promotes the intracellular accumulation of lipid peroxides and ferroptosis in KMLC  
19 both *in vitro* and *in vivo*. Our work supports a model whereby the high oxidative stress caused by  
20 KM dictates a dependency on newly synthesized FA to repair oxidated phospholipids, establishing  
21 a targetable vulnerability. These results connect KM oncogenic signaling, FASN induction and  
22 ferroptosis, indicating that FASN inhibitors already in clinical trial in KMLC patients  
23 (NCT03808558) may be rapidly deployed as therapy for KMLC.

## 1 Introduction

2 Mutant *KRAS* (KM) lung cancer (LC) is associated with poor prognosis and resistance to  
3 therapy. *KM* expression is not only sufficient to initiate LC but also essential for the viability of  
4 KMLC (Fisher et al., 2001; Sunaga et al., 2011). Notwithstanding the notable exception of the  
5 *KRAS<sup>G12C</sup>* mutant (Canon et al., 2019; Hallin et al., 2020; Janes et al., 2018; McCormick, 2019),  
6 KM remains undruggable. Furthermore, targeting the KM signaling network has proved to be  
7 either ineffective or toxic (Tomasini et al., 2016). Finally, cancer immunotherapy benefits only a  
8 minority of KMLC patients (Carbone et al., 2017; Reck et al., 2016). Therefore, there is an urgent  
9 need for novel therapeutic strategies for KMLC.

10 KM reprograms cellular metabolism, promoting aerobic glycolysis and lipid  
11 synthesis/uptake (Boroughs and DeBerardinis, 2015; Kamphorst et al., 2013a; Padanad et al.,  
12 2016). Notably, KM regulates the expression of fatty acid synthase (FASN), the rate-limiting  
13 enzyme of *de novo* lipogenesis (Gouw et al., 2017) and FASN inhibition is detrimental to several  
14 cancer types (Baenke et al., 2013; Currie et al., 2013; Rohrig and Schulze, 2016). We reported that  
15 acyl-CoA synthetase long chain family member 3 (ACSL3), which synthesizes fatty acyl-CoA  
16 esters, is required for the viability of KMLC both *in vitro* and *in vivo* (Padanad et al., 2016). Also,  
17 recent studies indicated that lipid metabolism mediates adaptations to oncogenic *KRAS<sup>G12C</sup>*  
18 inhibition (Santana-Codina et al., 2020). However, the mechanisms governing the interaction of  
19 KM with FA metabolism and their functional consequences have not been characterized in  
20 sufficient detail to inform cancer therapy.

21 FA are required for the synthesis of complex lipids, such as phospholipids (PL) or  
22 triacylglycerides (TAG), which are used to build cellular membranes, to produce ATP through  $\beta$ -  
23 oxidation (Baenke et al., 2013), or are stored in lipid droplets (Carracedo et al., 2013; Currie et al.,

1 2013). On the other hand, in the presence of reactive oxygen species (ROS), polyunsaturated FA  
2 (PUFA), long-chain FA with multiple double bonds, undergo lipid peroxidation causing  
3 ferroptosis, a form of nonapoptotic ROS-dependent programmed cell death (Yang et al., 2016).  
4 Ferroptosis plays an important role in the regulation of cell survival in several physiologic as well  
5 as pathologic processes, including cancer (Zheng and Conrad, 2020).

6 Three hallmark features define cancer cell sensitivity to ferroptosis: the presence of  
7 oxidizable PL containing PUFA (PUFA-PLs), redox-active iron and inefficient lipid peroxide  
8 repair (*e.g.* glutathione peroxidase 4, GPX4) (Dixon and Stockwell, 2019; Liu et al., 2018; Yang  
9 et al., 2014). Consequently, the genes and metabolic pathways controlling lipid peroxide repair,  
10 antioxidant response, or PUFA metabolism mediate the sensitivity to ferroptosis.

11 The Lands cycle is the main process through which PL are remodeled to modify their FA  
12 composition (Lands, 1960). This process is conserved in the plant and animal kingdoms allowing  
13 the generation of new PL, effectively bypassing *de novo* synthesis of the entire PL molecule.  
14 Importantly, lung tissue synthesizes dipalmitoyl-PC (the major component of pulmonary  
15 surfactant) through this pathway, by de-acylating PC at the sn<sub>2</sub> position and substituting a palmitic  
16 acid (C16:0) moiety at this site. Moreover, the Lands cycle constitutes the major route for  
17 incorporation and release of free arachidonic acid (AA, C20:4) and other PUFA into cellular PL,  
18 a process that is dependent on intracellular phospholipase A2 (PLA2). Hence, the proper regulation  
19 of the Lands cycle is important to control the accumulation of potentially toxic PL and FA, in order  
20 to maintain the integrity of cellular membranes (Ferrara et al., 2019; Wang and Tontonoz, 2019).

21 Here, we demonstrated that KMLC has high levels of PL decorated with saturated FA  
22 (SFA) and monounsaturated FA (MUFA). Moreover, FASN inhibition drastically reduces  
23 SFA/MUFA availability, obligating KMLC cells to incorporate the highly reactive PUFA into PL,

1 thus decreasing the threshold for ferroptosis. Notably, silencing the key regulators of the Lands  
2 cycle phospholipase A2 group IVC (*PLA2G4C*) and lysophosphatidylcholine acyltransferase 3  
3 (*LPCAT3*), induces ferroptosis in KMLC cells. We demonstrated that these processes are KM-  
4 dependent and confirmed our conclusions with metabolic flux analysis. This study provides the  
5 rationale for targeting FA synthesis and the Lands cycle as an effective therapeutic strategy for  
6 KMLC.

## 7 **Materials and Methods**

8 *Human LC samples and Human LC PDXs.* Human LC samples (n=6, Supplementary Table S1)  
9 were obtained from University of Cincinnati Biorepository under usage agreement (SR  
10 ID:TB0109). Frozen human LC PDXs (n=11, Supplementary Table S1) were obtained from  
11 Hamon Cancer Center at UT Southwestern Medical Center. Representative CT-scan images of a  
12 patient enrolled in the NCT03808558 trial were kindly provided by Dr. Gerber.

13 *Cell lines.* LC cell lines were obtained from the cell line repository of the Hamon Center for  
14 Therapeutic Oncology Research (UT Southwestern Medical Center (1,2), IMR-90 human lung  
15 fibroblasts were from ATCC, Dr. Monte M. Winslow kindly provided mouse KMLC cell lines  
16 238N1, 802T4, 368T1, 593T5 derived from LSL-*Kras*<sup>G12D</sup> lung tumors (Winslow et al., 2011).  
17 Cells were maintained as previously described (Konstantinidou et al., 2013; Padanad et al., 2016).  
18 For drug treatments, growth medium was replaced by HyClone RPMI medium (GE, SH30027)  
19 supplemented with 5% heat-inactivated dialyzed FBS (SIGMA-ALDRICH, F0394).

20 *Drugs and enzymatic inhibitors.* TVB-3664 (FASNi) or the inactive isomer (TVB-2632) were  
21 from Sagimet Biosciences (San Mateo, CA). ML162 (#20455) or Ferrostatin-1 (#17729) were  
22 from Cayman. ARS-1620 (HY-U00418) was from MedChemExpress. 16:0-18:1 PC (hereafter PC

1 #850457P), Sodium palmitate (#P9767) and N-Acetyl-L-cysteine (#A7250) were from Millipore-  
2 Sigma. CellROX™ Green Reagent (#C10444) was from Thermo Fischer Scientific.

3 *Mouse studies.* All animal studies were approved by the Institutional Animal Care and Use  
4 Committee (IACUC) at University of Cincinnati (protocol 18-04-16-01). Both male and female  
5 mice were included in the analysis. Power calculation was conducted using ClinCalc.com using  
6 mean tumor burden from previous mouse experiments (Konstantinidou et al., 2009; Padanad et  
7 al., 2016). The investigators were blinded during post-study data analyses.

8 *Transgenic mice.* *CCSP-rtTA/Tet-op-Kras<sup>G12D</sup>* (FVB/SV129 mixed background) mice were  
9 described previously (Fisher et al., 2001). We obtained lung-specific *Kras<sup>G12D</sup>* expression (i.e.  
10 KM) by feeding mice with doxycycline (doxy) -implemented food pellets (ENVIGO, TD 2018,  
11 625 Dox, G) for 2 months. At this point, mice were randomly assigned to vehicle or FASNi. Lungs  
12 of *CCSP-rtTA/Tet-O-EGFR<sup>L858R</sup>* mice were kindly provided by Dr. Katerina Politi.

13 *Xenograft mouse models.* We performed xenograft studies in 6-week-old NOD/SCID mice  
14 (Jackson Laboratory), as previously described (Konstantinidou et al., 2013; Padanad et al., 2016).  
15 Briefly,  $1 \times 10^6$  cells (A549 or H460) were injected in the right flank of NOD-SCID mice. Tumors  
16 were measured twice a week using a digital caliper. Mice were euthanized when xenografts  
17 reached 2 cm<sup>3</sup>.

18 *FASNi in vivo treatment.* TVB-3664 (60 mg/kg/100 µL/mouse) was dissolved in 0.2% DMSO-  
19 PBS, sonicated and administered daily via oral gavage. We treated *CCSP-rtTA/Tet-op-Kras<sup>G12D</sup>*  
20 mice after feeding them with doxy for 2 months. We treated NOD/SCID mice when xenografts  
21 reached ~30-50 mm<sup>3</sup>. At this time, mice were randomly assigned to either vehicle (0.2% DMSO  
22 in PBS, control) or FASNi (TVB-3664) group.

1 *Blood and tissue collection.* We collected blood (150  $\mu$ L) from the submandibular vein and left at  
2 RT until clot formation. Lung were harvested as previously described (Fisher et al., 2001). Briefly,  
3 we cannulated the right heart and perfused anesthetized with PBS lacking calcium and magnesium.  
4 Lung lobes were excised, then either fixed overnight in 4% paraformaldehyde at 4°C, or snap  
5 frozen and stored at -80°C for further analyses.

6 *Viability assays.* For MTT assays, we plated 5000 cells/0.1 mL/well in 96-well plates. The day  
7 after, we added 0.1 mL of medium containing appropriate concentrations of the compound under  
8 study to each well. After 7 days (or 5 days for ARS-1620) of treatment, 10  $\mu$ L of MTT solution (5  
9 mg/mL) was added into each well. After 4 hrs incubation, the medium was removed and the  
10 formazan salts dissolved in 200  $\mu$ L DMSO/ well for 10 min at 37°C. The absorbance was read at  
11 570 nm (OD 570 nm). Data are represented as mean  $\pm$  SD of 3 independent experiments.

12 *Crystal violet assays* were performed as previously described (Feoktistova et al., 2016). Briefly,  
13 3-4 x 10<sup>4</sup> cells/ well were seeded in 12-well plate. At the experimental endpoint, 0.25 mL/well of  
14 crystal violet solution (0.5% of crystal violet powder in 20% methanol) was added to the plate and  
15 incubated at RT for 20 min on an orbital shaker. After removing the crystal violet solution, the  
16 plate was washed with water and let to dry overnight. Pictures were taken before adding 1 mL/well  
17 of methanol. After shaking 20 min at RT, the absorbance was read at 570 nm (OD 570 nm).

18 *Cell cycle analysis.* We performed cell cycle analysis after 4 days of pharmacological treatments,  
19 or 72 hrs after siRNA transfection or doxy-dependent induction of shRNAs, respectively. The cells  
20 were fixed in ice-cold 70% ethanol for 30 min. RNA digestion was performed with 100 g/mL  
21 RNase A (Sigma Aldrich, R6513) for 15 min at 37°C. DNA staining was performed with 50  $\mu$ g/mL  
22 propidium iodide (Sigma Aldrich, P4170) for 30 min at 37°C. The cells were analyzed using a BD

1 LSRFortessa™ Flow Cytometer, and the cell cycle distribution was determined with FlowJo v8.7  
2 Software.

3 *Oil Red Oil Staining.* We treated cells either with FASNi, 0.2 μM or with DMSO, 0.2% (i.e.  
4 vehicle) for 4 days. Cells were rinsed with 1X PBS twice, fixed with formalin (3%) for 1 hour, and  
5 washed again. Cells were incubated with isopropanol (60%) for 5 minutes and then with ORO  
6 solution (ORO, 2mg/mL, Alfa Aesar, A12989) for 20 min. Nuclei were stained with hematoxylin  
7 stain solution, Gill 1(RICCA, #3535-16). For quantification, ORO staining was extracted with  
8 100% isopropanol. The absorbance was read at 492 nm.

9 *Protein extraction and Immunoblot.* Tissues or cell lines were lysed in ice-cold RIPA lysis buffer  
10 containing cOmplete™ protease inhibitors cocktail and PhosSTOP™ phosphatase inhibitors  
11 cocktail (Millipore Sigma). 30 μg of total protein were separated using Midi Criterion TGX Stain-  
12 Free precast gels (Bio-Rad, 5678024), transferred onto nitrocellulose membranes (Bio-Rad,  
13 1620112), and then blocked with 5% Blotting-Grade Blocker (Bio-Rad, 1606404) in TBS for 1 h,  
14 at RT. The membranes were incubated overnight at 4°C with the indicated primary antibodies:  
15 FASN (C20G5) rabbit mAb (CST, 1:1000 dil); SCD1 (C12H5) rabbit mAb (CST, 1:1000 dil);  
16 AMPKα Antibody rabbit pAb (CST #2532, 1:1000 dil); phospho-AMPKα (Thr172) (40H9) rabbit  
17 mAb (CST, 1:1000 dil); ACC1 (C83B10) Rabbit mAb (CST, 1:1000 dil); Phospho-ACC1 (Ser79)  
18 (D7D11) rabbit mAb (CST, 1:1000 dil); KRAS (234-4.2) mouse mAb (Millipore Sigma, 1:700  
19 dil); pan RAS (C-4) mAb (SCBT, 1:500 dil); Cofilin (D3F9) rabbit mAb (CST, 1:1000 dil). Cofilin  
20 was used as loading control. Either goat anti-rabbit or anti-mouse IgG (H+L) cross adsorbed,  
21 DyLight® 800 (Thermo Scientific, 1:5000 dil) was used as secondary antibody. Blots were  
22 analyzed using Odyssey Scanner and Image Studio Software (LI-COR).



1 *Malonyl-CoA quantification.* Malonyl-CoA concentration was assessed using the human malonyl  
2 Coenzyme A ELISA kit (MyBiosource, MBS705079), following manufacturer's instructions. Test  
3 samples were prepared in triplicates.

4 *Measurement of fatty acid oxidation (FAO).* We used a fatty acid oxidation colorimetric assay kit  
5 (Biomedical Research Service Center, State University of New York, E-141) as previously  
6 described (Kwong et al., 2019). Samples were assayed in triplicate.

7 *NADPH quantification.* NADPH in lysates of cell lines or A549 xenografts was determined using  
8 a colorimetric NADPH Assay Kit (Abcam's, ab186031), following the manufacturer's instructions  
9 on LC cells and A549 xenografts treated with either FASNi or vehicle for 4 days. Test samples  
10 were prepared in triplicates.

11 *AMP quantification.* We used a colorimetric AMP colorimetric assay kit (BioVision, K229-100)  
12 to detect AMP in cell lysates ( $\sim 1 \times 10^7$ ) and A549 xenografts ( $\sim 10$  mg) following the  
13 manufacturer's instructions. Samples were assayed in triplicate. 1 mM AMP Standard was used as  
14 positive control.

15 *Cu(I)-catalyzed azide-alkyne cycloaddition reaction (Click-iT chemistry).* Cells were grown on  
16 coverslips in a 12-well plate and kept either with FASNi, 0.2  $\mu$ M or with vehicle (DMSO, 0.2%)  
17 for 4 days. Then, we incubated them with 20  $\mu$ M arachidonic acid alkyne (Cayman Chemical,  
18 10538) in RPMI with 2% ultra-fatty acid free BSA (SIGMA ALDRICH, A6003-25G) for 6 hrs.  
19 After fixation with 3% paraformaldehyde in PBS for 15 min and permeabilization with 0.25%  
20 Triton X100 in PBS for 15 min, cells were washed with 1% BSA in PBS. The Click-iT reaction  
21 cocktail was prepared according to manufacturer's instructions (Kolb and Sharpless, 2003).  
22 Briefly, Click-iT™ Cell Reaction Buffer Kit (Thermo Scientific, C10269) was mixed with CuSO<sub>4</sub>  
23 (1 mM final concentration) and Alexa-Fluor 488 azide (10  $\mu$ M final concentration, Thermo

1 Scientific, A10266). After staining nuclei with DAPI, cells were washed again, and mounted on a  
2 slide using Fluoromount-G medium.

3 *C11-BODIPY staining.* We stained fixed cells with 2.5  $\mu$ M C11-BODIPY581/591 (SIGMA  
4 ALDRICH, D-3861) for 60 min. The ROS-dependent oxidation of the polyunsaturated butadienyl  
5 portion of this lipid probe results in a shift of the fluorescence emission peak from  $\sim$ 590 nm  
6 (reduced: red) to  $\sim$ 510 nm (peroxidized: green) (Drummen et al., 2002; Pap et al., 1999). Briefly,  
7 cells were treated with 0.2  $\mu$ M FASNi or 0.2% DMSO, for 4 days. In rescue experiments, cells  
8 were co-treated with FASNi and one of the following: palmitate (100  $\mu$ M), phosphatidylcholine  
9 (PC, 100  $\mu$ M), or Ferrostatin-1 (Fer-1, 1  $\mu$ M) for 4 days. 5 mM N-acyl-cysteine (NAC) was added  
10 for 60 min after 4 days of FASNi treatment. For snap-frozen samples, we used 10  $\mu$ m-thick cryo-  
11 sections of A549 xenografts (5 mice/group) and lungs of CCSP-rtTA/Tet-op-Kras (3 mice/group).  
12 Samples were incubated with C11-BODIPY581/59, washed with PBS, fixed with 10% formalin  
13 for 1 hour, counterstained with DAPI and mounted using Fluoromount-G medium (Thermo  
14 Scientific). For cells, three images per slide were acquired using a Zeiss LSM 710 confocal  
15 microscope equipped with a Plan-Apo 63x/1.4 oil DIC M27 objective. For tissues, three images  
16 per sample were acquired using a Lionheart FX (BioTek) and Gen5 software (v3.06). We  
17 quantified the images with ImageJ software (version 1.46; NIH, Bethesda, MD, USA).

18 *Plasmids and virus production.* *pBabe-Kras<sup>G12D</sup>* (#58902) and *LT3GEPiR* (#111177) were from  
19 Addgene. The insert expressing the shRNA was cloned into the vector *LT3GEPiR* in the XhoI and  
20 EcoRI sites. The shRNAs target sequences were selected either from the library described by  
21 Feldmann et al. (Fellmann et al., 2013) or from the splashRNA database (Pelosof et al., 2017)  
22 (<http://splashrna.mskcc.org/>). The hairpin targeting sequences are: *shLPCAT3 #1* 5'-  
23 GCCTCTCAATTGCTTATTTTA-3'; *shLPCAT3 #2* 5'-AAGGAAAGAGAAGTTAAA-3';

1 *shPLA2G4C* #1 5'-CAGAATGAATGTGATAGTTCA-3'; *shPLA2G4C* #2 5'-  
2 ACATGGTTATCTCTAAGCAAA-3'; *shGPX4* #1 5'-GTGGATGAAGATCCAACCCAA-3';  
3 *shGPX4* #2 5'-AGGCAAGACCGAAGTAAACTA-3'. *shKRAS* #10 5'-  
4 AAGTTGAGACCTTCTTAATTGGT-3'; *shKRAS* #40 5'-TCAGGACTTAGCAAGAAGTTA-  
5 3'. Production of lentiviruses was performed as previously described (Padanad et al., 2016).

6 *siRNA*. Predesigned FASN siRNAs were from Millipore Sigma (#1, SASI\_Hs01\_00057850; #2,  
7 SASI\_Hs01\_00057851; #3, SASI\_Hs02\_00336920; #4, SASI\_Hs01\_00057849). A custom  
8 siRNA library (Supplementary Table S2), universal MISSION® siRNA Universal Negative  
9 Control #1 (cat. SIC001) and #2 (cat. SIC002) were from Millipore Sigma. We used the  
10 DharmaFECT 4 Transfection Reagent (Thermo Scientific) for siRNA transfection. RNA was  
11 extracted using TRIzol Reagent (cat. 15596, Life Technologies) and retrotranscribed using iScript  
12 cDNA Synthesis kit (cat. 170-8891, Biorad). Knock-down efficiency was evaluated 48 hrs after  
13 transfection via real-time PCR using the PowerUP™ SYBR® Green Master Mix (cat. A25742,  
14 Thermo Fisher Scientific) and custom designed primers (Supplementary Table S2).

15 *RNA-seq and bioinformatic analysis*. We extracted total RNA with TRIzol. We removed residual  
16 genomic DNA was removed with the Turbo DNA-free kit (AM1907, ThermoFisher). One µg of  
17 total DNase-treated RNA was used for library preparation with the NEBNext Ultra II Directional  
18 RNA Library Prep kit. Reads were aligned to the human hg38 reference genome using STAR  
19 (v3.7.3a) (Dobin et al., 2013). Gencode annotation for human (version v37) was used as reference  
20 alignment annotation and downstream quantification. Gene level expression was calculated using  
21 featureCounts (v2.0.1) (Liao et al., 2014) using intersection-strict mode by exon. Counts were  
22 calculated based on protein-coding genes from the annotation file. Low expressed genes were  
23 filtered using a per time-point approach with RPKM  $\geq 0.5$  in all samples in one or the other time-

1 point. Differential expression was performed in R using *DESeq2* (Love et al., 2014). Surrogates  
2 variables were calculated using *sva* (Leek et al., 2012) and included in the modelling. We estimated  
3 log<sub>2</sub> fold changes and P-values. P-values were adjusted for multiple comparisons using a  
4 Benjamini-Hochberg correction (FDR). Differentially expressed genes were considered for FDR  
5 < 0.05. Gene list enrichment analysis was carried out using Enrichr (Chen et al., 2013; Kuleshov  
6 et al., 2016) (<https://amp.pharm.mssm.edu/Enrichr/#>).

7 *Laser-capture microdissection (LMD) of tumor tissue.* LMD was performed at the Histopathology  
8 Core of UT Southwestern Medical Center as previously described (Bonner et al., 1997). Briefly,  
9 10 μm cryo-sections of tumors were mounted onto PEN membrane glass slides (Thermo Fisher  
10 Scientific, LCM05220 Sections were then stained using Histogene™ Staining Solution (Thermo  
11 Fisher Scientific, KIT0415), washed with HPLC-grade water and subjected to LMD using a Leica  
12 LMD System. LMD sections were recovered in 0.2 mL tubes, immediately snap-frozen and stored  
13 at -80°C until the analysis. 4 replicates per sample were prepared.

14 *Solvents and reagents.* All the HPLC or LC/MS grade solvents were from Sigma-Aldrich (St  
15 Louis, MO, USA). SPLASH LipidoMix™ standards, were from Avanti Polar Lipids (Alabaster,  
16 AL, USA). Fatty acid (FA) standards (FA(16:0<sup>{2}H<sub>31</sub></sup>), FA(18:1<sup>ω9</sup><sup>{2}H<sub>5</sub></sup>) and FA(20:4<sup>ω6</sup><sup>{2}H<sub>8</sub></sup>)  
17 were from Cayman Chemical (Ann Arbor, MI, USA). An eVol® precision pipette equipped with  
18 a glass syringe (Trajan Scientific, Austin TX, USA) was used for the addition of FA standards.

19 *Sample preparation for MS/MS<sup>ALL</sup> and GC/MS.* Laser-captured microdissected samples, cell  
20 pellets containing 2.5 × 10<sup>5</sup> cells or 10 μL of serum were transferred to glass tubes for Liquid-  
21 Liquid Lipid Extractions (LLE). For xenografts, 100 mg of tissue were transferred to a 2.0 mL pre-  
22 filled Bead Ruptor tube (2.8 mm ceramic beads, Omni International, Kennesaw, GA, USA), and

1 homogenized in 1mL of methanol/dichloromethane (1:2, v/v) using a Bead Ruptor (Omni  
2 International). Aliquots equivalent to 0.5 mg of tissue were used for LLE.

3 *MALDI Imaging Mass Spectrometry (MALDI-IMS)*. 10- $\mu$ m-thick sections were mounted on PEN  
4 membrane glass slides and stored at -80°C. They were processed by the Chemical Imaging  
5 Research Core, UT MD Anderson Cancer Center. Matrix was applied using the sublimation  
6 method with a Shimadzu IM Layer (Shimadzu North America, Columbia, MD). Sampling was  
7 performed using DHB for positive mode and 9-AA for negative mode. We used 300 laser shots at  
8 1 KHz using a laser pulse energy with an average of 25  $\mu$ J. For DHB and 9-AA, the laser was  
9 adjusted to 60% and 50%, respectively. The mass range was 50-1200 m/z, and the instrument was  
10 calibrated using peak signals from red phosphorus. For MS/MS MSI analysis of taurodeoxycholic  
11 acid, parent ion at m/z 498.295 was selected, and fragment ion at m/z 124.006 was monitored at a  
12 collision trap voltage of 40 V. The laser shots were 500 shots per spot at 50% power. Data were  
13 acquired using a Waters Synapt G2 Si (Waters Corporation, Milford, MA) at 60- $\mu$ m spot size with  
14 100- $\mu$ m spacing. For relative quantitation, the MSI data were converted to msIQuant format via  
15 imzML. Regions of interest (ROI) were annotated manually in msIQuant version 2.0 (Källback et  
16 al., 2016). Total ion current (TIC) normalized average intensities of metabolites were exported  
17 from each region for statistical analysis. Peak identification was manually done using LIPID  
18 MAPS Lipidomic Database (LMSD).

19 *Lipidomic experiments*. After 4 days of treatment, with vehicle or FASNi, cells were either washed  
20 twice with cold PBS and harvested for MS/MS<sup>ALL</sup>, or incubated with 3 mM Ethyl Acetate-1,2 <sup>13</sup>C<sub>2</sub>  
21 (SIGMA ALDRICH, 283819) for 7 hours (1 hour for the time-lapse experiment) to measure *de*  
22 *novo* palmitate synthesis by GC/MS.

1 *Lipid profiling by direct-infusion MS/MS<sup>ALL</sup>*. The LLE was performed at RT through a modified  
2 Bligh/Dyer extraction technique. Briefly, 3mL of methanol/dichloromethane/water (1:1:1, v/v)  
3 were added to the samples. The mixture was vortexed and centrifuged at 2671 g for 5 min. The  
4 organic phase (bottom phase) was collected and dried under N<sub>2</sub>. The extracts were resuspended in  
5 600 μL of dichloromethane/methanol/isopropanol (2:1:1, v/v/v) containing 8mM ammonium  
6 fluoride (NH<sub>4</sub>F) and 33 μL of 3:50 diluted SPLASH LipidoMix™ internal standard. Extracts were  
7 infused into a SCIEX quadrupole time-of-flight (QTOF) TripleTOF 6600+ mass spectrometer  
8 (Framingham, MA, USA) via a custom configured LEAP InfusePAL HTS-xt autosampler  
9 (Morrisville, NC, USA). Electrospray ionization (ESI) source parameters were, GS1 25, GS2 55,  
10 curtain gas (Cur) 20, source temperature 300 °C and ion spray voltage 5500V and -4500V in  
11 positive and negative ionization mode, respectively. GS1 and 2 were zero-grade air, while Cur and  
12 CAD gas was nitrogen. Optimal declustering potential and collision energy settings were 120V  
13 and 40eV for positive ionization mode and -90V and -50eV for negative ionization mode. Samples  
14 were infused for 3 min at a flow rate of 10μL/min. MS/MS<sup>ALL</sup> analysis was performed by  
15 collecting product-ion spectra at each unit mass from 200-1200 Da. Analyst® TF 1.7.1 software  
16 (SCIEX) was used for TOF MS and MS/MS<sup>ALL</sup> data acquisition. Data analysis was performed  
17 using an in-house script, LipPy. This script provides instrument quality control information,  
18 isotopic peak corrections, lipid species identification, data normalization, and basic statistics.

19 *Fatty acid profiling by GC-MS*. Total fatty acid profiles were generated by a modified GC-MS  
20 method previously described (Quehenberger et al., 2011). The lipid extract was spiked with 100uL  
21 of 0.5μg/mL FA standard mixture (FA(16:0 {<sup>2</sup>H<sub>31</sub>}), FA(20:4 ω<sub>6</sub> {<sup>2</sup>H<sub>8</sub>}) and FA(22:6 ω<sub>3</sub> {<sup>2</sup>H<sub>5</sub>}) in  
22 methanol, then hydrolyzed in 1 mL of 0.5M potassium hydroxide solution prepared in methanol  
23 at 80 °C for one hour. Hydrolyzed FA were extracted by adding 2mL of dichloromethane/water

1 (1:1, v/v) to the sample in hydrolysis solution. The mixture was vortexed and centrifuged at 2671  
2 g for 5 min. The organic phase (bottom phase) was collected and dried under N<sub>2</sub>. For the free FA  
3 profile, the lipids were extracted by adding 500 μL of water, 500 μL of methanol containing 50  
4 mM of HCL and 1mL of iso-octane to the glass tube containing the sample. The solution was  
5 spiked with 100 μL of 0.5 μg/mL fatty acid standard mixture, shaken for 5 min, centrifuged at  
6 2671 g for 5 min, and the organic phase (upper phase) was collected to a fresh glass tube. The  
7 extraction procedure was repeated two times by adding 1mL of iso-octane to the mixture. The  
8 organic phases were pooled together and dried under N<sub>2</sub>. To analyze FA present in the polar lipid  
9 fraction, a three-phase extraction method was performed, as already described (Vale et al., 2019).  
10 Briefly, lipids were extracted with water, methyl acetate, acetonitrile (ACN) and Hexane  
11 (1:1:0.75:1). After centrifugation, polar lipids (upper phase) were collected and dried. Total or  
12 polar FA samples were resuspended in 50 μL of 1 % triethylamine in acetone, and derivatized with  
13 50 μL of 1% pentafluorobenzyl bromide (PFBBBr) in acetone at RT for 25 min in capped glass  
14 tubes. Solvents were dried under N<sub>2</sub>, and samples were resuspended in 500 μL of isooctane.  
15 Samples were analyzed using an Agilent 7890/5975C (Santa Clara, CA, USA) by electron capture  
16 negative ionization (ECNI) equipped with a DB-5MS column (40m x 0.180mm with 0.18μm film  
17 thickness) from Agilent. Hydrogen (carrier gas) flow rate was 1.6mL/min and injection port  
18 temperature was set at 300 °C. Sample injection volume was 1μL. Initial oven temperature was  
19 set at 150 °C, and then increased to 200 °C at a 25 °C/min, followed by an increase of 8 °C/min  
20 until a temperature of 300 °C was reached and held for 2.2 min, for a total run time was 16.7 min.  
21 FA were analyzed in selected ion monitoring (SIM) mode. The FA data were normalized to the  
22 internal standards. Fatty acid with carbon length  $C \leq 18$  were normalized to FA(16:0<sup>2</sup>H<sub>31</sub>),  $C =$

1 20 were normalized to FA(20:4  $\omega$ 6<sup>{2}H<sub>8</sub></sup>), and C = 22 were normalized to FA(22:6  $\omega$ 3<sup>{2}H<sub>5</sub></sup>). Data  
2 were processed using MassHunter software (Agilent).  
3 *HPLC-MS/MS*. PDXs and human lung cancer specimens were stored at -80 °C. LLE was  
4 performed using a modified Bligh/Dyer extraction technique. The extracts were resuspended in 30  
5  $\mu$ L of dichloromethane/methanol/isopropanol (IPA) (2:1:1, v/v/v) containing 8mM NH<sub>4</sub>F and  
6 SPLASH LipidoMix™ internal standards. Reversed-phase chromatographic separation was  
7 achieved with the Acclaim C30 column: 3  $\mu$ m, 2.1  $\times$  150 mm (Thermo Fisher Scientific, Waltham,  
8 MA). The column was maintained at 35°C and tray at 20°C. Solvent A was composed of 10 mM  
9 ammonium formate (AF, LC-MS grade) in 60:40 Acetonitrile (ACN):water (LC-MS grade) with  
10 0.1% formic acid (FA, LC-MS grade). Solvent B was composed of 10 mM AF with 90:10  
11 IPA:ACN with 0.1% FA. The flow rate was 250  $\mu$ L/min, and the injection volume was 10  $\mu$ L. The  
12 gradient was 50% solvent A (3 to 50%). The Orbitrap (Thermo) mass spectrometer was operated  
13 under heated electrospray ionization (HESI) in positive and negative modes separately for each  
14 sample. The spray voltage was 3.5 and 2.4 kV for positive and negative mode, the heated capillary  
15 was held at 350 °C and heater at 275°C. The S-lens radio frequency (RF) level was 45. The sheath  
16 gas flow rate was 45 units, and auxiliary gas was 8 units. Full scan (m/z 250–1200) used resolution  
17 30,000 at m/z 200 with automatic gain control (AGC) target of 2  $\times$  10<sup>5</sup> ions and maximum ion  
18 injection time (IT) of 100 ms. Normalized collision energy (NCE) settings were 25, 30, 35 %.  
19 Lipid identification and relative quantification were performed with LipidSearch 4.1 software  
20 (Thermo) as previously described (Breitkopf et al., 2017). The search criteria were as follows:  
21 product search; parent m/z tolerance 5 ppm; product m/z tolerance 10 ppm; product ion intensity  
22 threshold 1%; filters: top rank, main isomer peak, FA priority; quantification: m/z tolerance 5 ppm,



1 retention time tolerance 1 min. The following adducts were allowed in positive mode: +H, +NH<sub>4</sub>,  
2 +H—H<sub>2</sub>O, +H—2H<sub>2</sub>O, +2H, and negative mode: —H, +HCOO, +CH<sub>3</sub>COO, -2H.

3 *Statistical analysis.* Data analysis was performed using Microsoft Excel for Mac (version 16.34)  
4 and GraphPad Prism version 9 (GraphPad Software, San Diego, CA, USA, [www.graphpad.com](http://www.graphpad.com)).

5 All data presented are expressed as mean ± SEM or ±SD of three or more biological  
6 replicates/group (n values in each figure/figure legend). The significance of the results was  
7 assessed using two-tailed unpaired Student's t test to compare two groups. When more than two  
8 groups were compared, one- or two-way ANOVA was used followed by Dunnett's, Tukey's or  
9 Sidak's post-test.

## 10 **Results**

### 11 **Mutant KRAS induces a specific lipid profile in lung cancer.**

12 *CCSP-rtTA/Tet-O-Kras<sup>G12D</sup>* (hereafter *TetO-Kras<sup>G12D</sup>*) and *CCSP-rtTA/Tet-O-EGFR<sup>L858R</sup>*  
13 (hereafter *TetO-EGFR<sup>L858R</sup>*) mice, when fed doxy, invariably develop lung tumors which  
14 recapitulate tumorigenesis and histological features of human LC (Fisher et al., 2001; Politi et al.,  
15 2006). We performed mass spectrometry (MS) analysis on micro-dissected lung tumors and  
16 unaffected parenchyma (Fig. 1A). We found that the two tumor types have different lipidomic  
17 signatures. *TetO-Kras<sup>G12D</sup>* LC shows a significant increase in PC and TAG, as well as of  
18 sphingomyelins (SM) and phosphatidylethanolamine (PE), and a decrease in  
19 lysophosphatylcholines (LysoPC), while *TetO-EGFR<sup>L858R</sup>* preferentially has high  
20 phosphatidylinositol (PI) and low TAG, (Fig. 1B, Supplementary Fig. S1A). Nevertheless, both  
21 *TetO-Kras<sup>G12D</sup>* and *TetO-EGFR<sup>L858R</sup>* tumors have higher cholesteryl-esters (CE) and lower  
22 diacylglycerides (DAG) than healthy lung (Fig. 1B, Supplementary Fig. S1A). In particular, *TetO-*  
23 *Kras<sup>G12D</sup>* tumors are enriched in PC species with SFA and MUFA acyl chains, but have less PUFA-

1 containing PC (and PE) than healthy lung (Fig.1C). To determine the spatial distribution of the  
2 major lipid species identified by MS, we used Matrix Assisted Laser Desorption/Ionization  
3 (MALDI) imaging. We confirmed that *TetO-Kras<sup>G12D</sup>* tumors are enriched in TAG, SM and PC  
4 (Fig. 1D). In particular, we observed that SFA- and MUFA-PC are preferentially localized within  
5 the tumors, while PUFA-PC accumulate in the surrounding lung parenchyma (Fig. 1D). Notably, we  
6 observed the same lipidomic pattern in KMLC patient-derived xenografts (PDXs) and primary  
7 patient specimens (Fig. 1E-G; Supplementary Fig. S1B).

8         These data suggest that KM increases the intratumor availability SFA and MUFA for the  
9 synthesis of TAG and PC (Supplementary Fig. S1C).

## 10 **Mutant KRAS induces a dependency on *de novo* lipogenesis**

11         To test whether the lipidome of KMLC depends on *de novo* lipogenesis, we used TVB-3664  
12 (Sagimet Biosciences), a specific FASN inhibitor (FASNi), and *FASN* silencing on a panel of human  
13 and mouse LC-derived cell lines (Gazdar et al., 2010; Phelps et al., 1996; Winslow et al., 2011) (Fig.  
14 2A and Supplementary Fig. S2). Both approaches caused a G2/M cell cycle arrest in KMLC, without  
15 affecting KRAS-WT and EGFR-MUT LC cells (Fig. 2B; Supplementary Fig. S2). Notably,  
16 exogenous palmitate rescues the detrimental effects of FASNi, while an inactive FASNi isomer does  
17 not affect the viability of KMLC cells (Fig. 2A and 2B). As previously reported (Gouw et al., 2017),  
18 we found that KM correlates with FASN overexpression in *TetO-Kras<sup>G12D</sup>* mice (Supplementary  
19 Fig. S3A), in human KMLC cell lines (Supplementary Fig. S3B) and two independent tumor  
20 microarrays (Supplementary Table S3; Supplementary Fig. S3C-S3F), while there is no significant  
21 correlation with EGFR-MUT (Supplementary Fig. S3G and S3H).

22         To test whether *KM* expression is sufficient to establish a dependency on FASN, we  
23 ectopically expressed *KM* in H522 and H661 KRAS-WT LC cells. KM induces upregulation of

1 FASN and its downstream enzyme, stearoyl-CoA desaturase 1 (SCD1) (Fig. 2C), accumulation of  
2 lipid droplets (Fig. 2D; Supplementary Fig. S4A) and palmitate (Fig. 2E), sensitivity to FASN  
3 inhibition and *FASN* silencing (Fig. 2F; Supplementary Fig. S4B and S4C). On the contrary, *KRAS*  
4 silencing induces a significant decrease of FASN in KMLC cells (Fig. 2G), which also become  
5 resistant to FASNi (Fig. 2H). Furthermore, the *KRAS*<sup>G12C</sup> inhibitor ARS-1620 reverses the effects  
6 FASNi in *KRAS*<sup>G12C</sup> LC cell lines (Fig. 2I and 2J). All together these data demonstrate that KM  
7 causes LC cells to become dependent on FASN.

### 8 **FASNi inhibits *de novo* lipogenesis independently of KRAS mutational status**

9 To gather mechanistic insights into the differential sensitivity to FASNi, we measured the  
10 drug uptake, stability and its activity in LC cells.

11 Irrespective of the *KRAS* mutational status, FASNi readily accumulates intracellularly  
12 (Supplementary Fig. S5A and S5B), inhibits *de novo* FA synthesis (Fig. 3A; Supplementary Fig.  
13 S5C), causes a concomitant accumulation of malonyl-CoA (FASN substrate) and NADPH (FASN  
14 cofactor) (Fig. 3B and 3C), depletion of lipid droplets (Fig. 3G; Supplementary Fig. S5D) and  
15 downregulation of  $\beta$ -oxidation (Fig. 3E). Moreover, FASNi causes accumulation of AMP (Fig. 3F),  
16 triggering the phosphorylation of AMPK and ACC1 in both genotypes (pACC1<sup>S79</sup>) (Fig. 3G). This  
17 observation is consistent with the notion that AMPK limits FA synthesis through direct  
18 phosphorylation of ACC1, the enzyme that catalyzes the synthesis of malonyl-CoA, the substrate  
19 of FASN (Garcia and Shaw, 2017). Thus, the activation of AMPK/ACC1 enhances the effect of  
20 FASNi on FA synthesis (Fig. 3H). However, since these effects occur in both KM and *KRAS*-WT  
21 LC cells, they do not provide an explanation for the specific dependency of KMLC cells on FASN.

### 22 **FASN inhibition induces accumulation of PUFA-phospholipids in KMLC cells**

1 To investigate the metabolic impact of FASN inhibition, we performed MS/MS<sup>ALL</sup>  
2 untargeted lipidomic analysis. We found that FASNi induces accumulation of LysoPC only in  
3 KMLC cells. On the contrary, FASNi causes a concomitant decrease of TAG and an increase of  
4 DAG irrespectively of *KRAS* status (Fig. 4A and 4B). No significant changes were found in the  
5 activity of either the PC- specific phospholipase C (PLC) (Supplementary Fig. S5D) or the TAG-  
6 specific lipase ATGL (Supplementary Fig. S5E), suggesting FASNi does not affect PC and TAG  
7 lipolysis (Zechner et al., 2012). These findings suggest that KMLC uses *de novo* lipogenesis to fuel  
8 the synthesis of TAG and PC. Notably, we found that KMLC cells accumulate PUFA in LysoPC  
9 and PC upon FASNi (Fig. 4C-4F). In particular, LysoPC containing FA with two and four double  
10 bonds account for the LysoPC increase in FASNi-treated KMLC cells (Fig. 4C and 4D). Moreover,  
11 even though we did not detect a significant change in the total amount of PC (Fig. 4A and 4B), we  
12 observed the accumulation of PUFA-PC and depletion of SFA- and MUFA-PC in FASNi-treated  
13 KMLC cells ( (Fig. 4E and 4F). This change in the composition of the acyl chains is specific for PC  
14 and LysoPC of KMLC, because other lipid classes, such as TAG, do not increase their incorporation  
15 of PUFA in response to FASNi (Fig. 4G and 4H). These data indicate not only that FASN provides  
16 SFA and MUFA for the synthesis of TAG and PC in KMLC, but also that its inhibition causes the  
17 incorporation of PUFA specifically in PC and LysoPC.

### 18 **The Lands cycle prevents the accumulation of PUFA in PC of KMLC**

19 PC are synthesized via the Kennedy pathway which conjugates phosphocholine to DAG  
20 (KENNEDY and WEISS, 1956). However, the majority of PL synthesized via the Kennedy pathway  
21 are remodeled through the Lands cycle, which consists in the de-acylation of PC and re-acylation of  
22 LysoPC (Lands, 1960; Wang and Tontonoz, 2019; Zhao et al., 2008). To test whether FASN  
23 inhibition induces uptake and incorporation of exogenous PUFA, we used arachidonic acid (AA, FA

1 20:4) as PUFA proxy (Fig. 5A-D). In mammals, AA is provided by exogenous dietary sources rich  
2 either in AA or its parent molecule linoleic acid (LA, FA 18:2), which is desaturated and elongated  
3 in the endoplasmic reticulum to yield AA (Hanna and Hafez, 2018). Even though FASNi increases  
4 the total amount of AA in KMLC cells (Fig. 5A), ethyl acetate-2-<sup>13</sup>C metabolic flux analysis  
5 revealed a decreased isotope incorporation in AA of FASNi-treated KMLC cells (Fig. 5B). These  
6 data suggest that the intracellular pool of PUFA is dependent on their uptake from the  
7 microenvironment. This conclusion is consistent with our MALDI imaging data showing that  
8 PUFA-PC are enriched in the lung parenchyma surrounding the KM tumors (Fig. 1D-E).

9 To confirm this conclusion, we used click chemistry to conjugate AA-Alkyne to the Alexa  
10 Fluor 488-azide (Gaebler et al., 2013; Gao and Hannoush, 2014; Robichaud et al., 2016). We  
11 demonstrated that, even though the baseline AA uptake is lower in KMLC as compared to KRAS-  
12 WT cells, FASNi treatment increases the incorporation of AA only in KMLC cells (Fig. 5C and  
13 5D). Noteworthy, ectopic expression of KM significantly increases AA uptake during FASNi  
14 treatment (H552-KM, Fig. 5C and 5D), indicating that this process is dependent on KM.

15 FASNi treatment upregulates several genes involved in the metabolism of lipids and lipoproteins  
16 in both KM and wtKRAS LC cells (Fig. 5E; Supplementary Table S3). However, we found that only  
17 FASNi-treated KMLC cells selectively upregulate metabolic genes such as *PLA2G4C*, *LPCAT3* and  
18 *ACSL3* (Fig. 5F). These genes are involved in the remodeling of phospholipids through the Lands  
19 cycle and in ferroptosis (Fig. 5G), a regulated form of cell death characterized by lipid peroxidation  
20 (Dixon et al., 2012; Lands, 1960). In particular, *PLA2G4C* is a member of the PLA2 family, which  
21 hydrolyses PL to produce free FA and lysophospholipids (LysoPL). *LPCAT3* inserts acyl groups  
22 into LysoPL, specifically forming PC and PE (Zhao et al., 2008) and it is also required for cells to  
23 undergo ferroptosis (Dixon et al., 2015; Kagan et al., 2017). *ACSL3* converts free long-chain FA

1 into fatty acyl-CoA esters which undergo  $\beta$ -oxidation or incorporation into PL (Yao and Ye, 2008).  
2 ACSL3 is required for KMLC tumorigenesis (Padanad et al., 2016), it plays an important role in  
3 AA metabolism in LC (Saliakoura et al., 2020) and protects cells from ferroptosis (Magtanong et  
4 al., 2019; Ubellacker et al., 2020). To validate these RNA-seq data, we perform a custom siRNA  
5 screen targeting 29 lipid metabolism genes. We found that 10 genes, including *PLA2G4C*, *LPCAT3*,  
6 *LPCAT1*, *ACSL3* and glutathione peroxidase 4 (*GPX4*), which counteracts ferroptosis by catalyzing  
7 the reduction of peroxidized PL (Liu et al., 2018; Viswanathan et al., 2017; Yang et al., 2014, 2016;  
8 Zheng and Conrad, 2020), are selectively required for the viability of KM but not of KRAS-WT LC  
9 cells (Fig. 5H and 5I).

10 Consistently, KMLC cells are more sensitive than KRAS-WT LC cells to ML162, a specific  
11 inhibitor of GPX4 and an inducer of ferroptosis (Supplementary Fig. S6A and S6B), and we rescued  
12 the effect of FASNi using the anti-ferroptotic molecule ferrostatin-1 (Fer-1) (Supplementary Fig.  
13 S6A-S6F). Stable knock-down of *GPX4*, *LPCAT3* and *PLA2G4C* phenocopies the effect of ML162  
14 or FASNi, inducing G2/M cell cycle arrest specifically in KMLC cells (Supplementary Fig. S6G and  
15 S6H), a feature often associated with ferroptosis (Greenshields et al., 2017; Lin et al., 2016). These  
16 results, along with the lipidomic profile of KMLC (Fig. 1; Fig. 4), indicate that the *de novo*  
17 lipogenesis is necessary to repair/prevent lipid peroxidation in KMLC by feeding the Lands cycle  
18 with SFA and MUFA. To demonstrate this hypothesis, we performed stable knock-down of *LPCAT3*  
19 and *PLA2G4C* in KMLC cells. Then we subjected them to 3PLE extraction (Vale et al., 2019)  
20 coupled with either ethyl acetate-2-<sup>13</sup>C metabolic flux analysis (Fig. 5J) or steady-state MS/MS<sup>ALL</sup>  
21 lipidomic analysis (Fig. 5K). We determined that silencing either *LPCAT3* or *PLA2G4C*  
22 phenocopies FASN inhibition, decreasing the incorporation of *de novo* synthesized SFA, such as  
23 palmitate (FA 16:0) (Fig. 5J), while increasing the AA (FA 20:4) content of PL (Fig. 5K). These

1 data demonstrate that both *de novo* FA synthesis and PL remodeling are necessary to prevent  
2 PUFA accumulation and ferroptosis in KMLC cells (Fig. 5L and 5M).

### 3 **FASN and the Lands cycle are required to deflect ferroptosis in KMLC.**

4 Using the lipid peroxidation probe C11-BODIPY (581/591), we confirmed that FASNi  
5 causes ferroptosis specifically in KMLC cells, leaving KRAS-WT cells unaffected (Fig. 6A and 6B).  
6 Notably, ectopic expression of *KM* in KRAS-WT cells causes C11-BODIPY oxidation in response  
7 to FASN inhibition (Fig. 6C and 6D), indicating that *KM* is required for the induction of ferroptosis.  
8 *TP53*, *STK11* and *KEAP1/NFE2L2* (also known as *NRF2*) are frequently mutated in KMLC,  
9 deregulating cellular metabolism and oxidative stress (Galan-Cobo et al., 2019; Hassannia et al.,  
10 2019; Hayes and McMahon, 2009; Romero et al., 2017; Tarangelo et al., 2018). We did not find any  
11 correlation between their mutational status and sensitivity to FASNi in the LC cell lines we used  
12 (Supplementary Table S5). Therefore, these data indicate that the susceptibility of KMLC to  
13 ferroptosis depends on *KM*, rather than on *KEAP1/NFE2L2*, *TP53* and *STK11* co-occurring  
14 mutations.

15 Next, we used the 3PLE extraction method coupled with UV absorbance to measure the  
16 FA oxidation in the neutral (*e.g.* TAG) and polar lipid (*e.g.* PL and LysoPL) fractions of KMLC  
17 cells (Supplementary Figure S7A) (Vale et al., 2019). Indeed, as oxidation occurs in lipids  
18 containing two or more double bonds, it causes an increase in the UV emission that can be used to  
19 quantify the rate of primary lipid oxidation (Kim and LaBella, 1987). We found that FASNi induces  
20 oxidation specifically of the polar lipid fraction of KMLC cells (Supplementary Figure S7B), without  
21 perturbing neutral lipids (Supplementary Figure S7C). This finding is consistent with the observation  
22 that in KMLC cells, FASNi leads to an enrichment of PUFA specifically in PC and LysoPC, but not

1 in TAG (Fig. 4). Accordingly, PC supplementation quenches ROS production and propagation in  
2 KMLC cell treated with FASNi (Supplementary Figure S7D and Supplementary Video ).

3 To further demonstrate that FASN and the Lands cycle are necessary to prevent ferroptosis,  
4 we treated KMLC cells with FASNi and/or molecules targeting the cysteine/GSH/GPX4 system,  
5 one of the mainstays restricting ferroptosis (Fig. 6E). Noteworthy, while PC, palmitate, ferrostatin-  
6 1 (Fer-1), and N-acetyl-cysteine (NAC) rescue the C11-BODIPY oxidation induced by FASNi,  
7 the PUFA linoleic acid (LA) does not (Fig. 6F, G). Furthermore, silencing of *LPCAT3* or  
8 *PLA2G4C* induces significant C11-BODIPY oxidation in KMLC cells (Fig. 6H, I).

### 9 **Pharmacologic inhibition of FASN suppresses KMLC *in vivo*.**

10 We explored the preclinical significance of our findings using transgenic *TetO-Kras<sup>G12D</sup>*  
11 mice (Fig. 7A, B) and xenografts of A549 and H460 KMLC cells (Fig. 7C, D). In all the preclinical  
12 mouse models, FASNi causes a potent anti-tumor effect without overt systemic toxicities (Fig. 7A-  
13 D; Supplementary Fig. S8A-C), and it depletes intratumor and serum palmitate (Supplementary Fig.  
14 S8D). Notably, FASNi induces lipid oxidation in both autochthonous and xenograft KMLC, as  
15 demonstrated by C11-BODIPY staining (Fig. 7F-7H). In addition, lipidomic analysis (Fig. 7H) and  
16 MALDI imaging (Supplementary Fig. S8E) confirmed that inhibiting *de novo* lipogenesis causes  
17 accumulation of PUFA specifically in PC and Lyso-PC of KMLC tumors. On the other hand, TAG  
18 are downregulated and DAG are upregulated, independently of the saturation of their acyl chains  
19 (Fig. 7H; Supplementary Fig. S8E). These data phenocopy the findings obtained *in vitro* (Fig. 4)  
20 providing further evidence that FASNi induces ferroptosis in KMLC. This preclinical evidence will  
21 inform the ongoing clinical trial with the human specific FASN inhibitor TVB-2640, which is  
22 showing promising results in KMLC patients (NCT03808558, Fig. 7I).

23



## 1 Discussion

2 KM is the most commonly mutated oncogene in cancer (Prior et al., 2020). There is a considerable  
3 interest in determining the mechanisms underlying KM-driven tumorigenesis and KM-dependent  
4 tumor survival. This knowledge is a prerequisite to develop novel therapies as well as to optimize  
5 the use of existing drugs that target either KM or its downstream signaling pathways. It is well know  
6 that KM contributes to the regulation of cancer metabolism; however, no metabolic network has  
7 been established as *a bona fide* therapeutic target (Boroughs and DeBerardinis, 2015). Furthermore,  
8 it is also emerging that metabolic adaptations mediate resistance to KRAS inhibitors (Santana-  
9 Codina et al., 2020).

10 Here, we report that KMLC depends on *de novo* FA synthesis and PL remodeling to cope with  
11 oxidative stress and to escape ferroptosis. In KMLC, KM upregulates FASN, whose inhibition  
12 causes lipid peroxidation and ferroptosis. These effects are specific since metabolites immediately  
13 downstream FASN (i.e. palmitate or PC) rescue this phenotype. We determined that KM, but not  
14 EGFR-MUT, is necessary and sufficient to establish the dependency on FASN. On the contrary, we  
15 found no correlation with *TP53*, *STK11/LKB1* or *NFE2L2/NRF2* which are frequently co-mutated  
16 with KM and known to influence metabolism and oxidative stress (Galan-Cobo et al., 2019; Romero  
17 et al., 2017).

18 It is a long-standing observation that *FASN* is overexpressed in several cancer types and that KM  
19 upregulates its expression (Gouw et al., 2017). It has been proposed that FA meet the requirements  
20 of highly proliferative cells providing building blocks for membranes, or sustaining ATP production  
21 through  $\beta$ -oxidation (Baenke et al., 2013). However, the inhibition of these processes does not affect  
22 KRAS-WT cells and does not explain the exquisite and specific dependency of KMLC on *de novo*  
23 lipogenesis.

1           Our comprehensive metabolic and functional analysis shows, for the first time, that KM  
2 upregulates FASN to increase the synthesis of SFA and MUFA to prevent and repair lipid  
3 peroxidation in LC. Our conclusion is supported by unprecedented metabolic flux analysis showing  
4 how FASNi induces the incorporation of PUFA into PL, in particular PC. When *de novo*  
5 lipogenesis is impaired, KMLC increases the uptake of exogenous PUFA. However, even though  
6 we demonstrated that cellular lipolysis does not account for this process, we cannot exclude that  
7 other mechanisms like lipophagy and macropinocytosis (Kamphorst et al., 2013b; Kounakis et al.,  
8 2019) might contribute to the enrichment of PUFA observed after FASN inhibition.

9           Because of their multiple double bonds, PUFA are the major substrate of lipid peroxidation  
10 (Choi et al., 2011; Dixon et al., 2012; Hassannia et al., 2019). Therefore, cells use the Lands cycle  
11 to limit the amount of PUFA incorporated in PL, reducing lipid peroxidation and the likelihood to  
12 trigger ferroptosis (Pérez et al., 2006; Saliakoura et al., 2020; Surette et al., 1999). Accordingly, we  
13 found that silencing key regulators of the Lands cycle induces PUFA accumulation in the side chains  
14 of PL, leading KMLC to ferroptosis.

15           KM expression and/or activation of the RAS/MAPK pathway have been reported to  
16 sensitize cells to ferroptosis inducers (Poursaitidis et al., 2017; Yagoda et al., 2007; Yang and  
17 Stockwell, 2008). However, later studies challenged these conclusions (Yang et al., 2014). We  
18 reason that this incongruency is explained by the fact that activation of KRAS pathway increases  
19 the susceptibility to ferroptosis, but that cell context specific factors contribute to its execution.

20           Our data indicate that KMLC has a lipidomic profile that is reminiscent of alveolar type II  
21 cells (AT2), which are considered the cells of origin of LC (Rowbotham and Kim, 2014). AT2 cells  
22 are a major source for surfactant lipids secreted into the alveoli. Surfactant lipids comprise about  
23 90% of pulmonary surfactant, a lipoprotein complex which decreases surface tension in the post-

1 natal lung and prevents alveolar collapse. PC are the most abundant surfactants lipids (Griese et al.,  
2 2015). Notably, SFA and MUFA-PC like dipalmitoylphosphatidylcholine PC 32:0 (DPPC,  
3 16:0/16:0), PC 32:1 (16:0/16:1) and PC 30:0 (16:0/14:0) are the most abundant members of  
4 surfactant PC both in AT2 cells and in KMLC (Batenburg, 1992; Holm et al., 1996; Kyle et al.,  
5 2018). Thus, it seems reasonable to conclude that KM hijacks lung specific mechanisms evolved to  
6 mitigate oxidative stress and ferroptosis under the high oxygen tension conditions found in the  
7 pulmonary alveolus (Guo et al., 2019). Indeed, transitioning from the fetal hypoxic environment to  
8 air breathing at birth requires the activation of adaptive responses, as demonstrated by the  
9 observation that, mouse AT2 not only have high expression of *Kras* soon after birth, but they also  
10 exhibit high expression of genes involved in the unfolded protein response (UPR), antioxidant  
11 response and lipid synthesis (Guo et al., 2019). Hence, FASNi interferes with the PC-dependent  
12 antioxidant function, decreasing the threshold to ferroptosis in the context of high ROS in KMLC.  
13 In this scenario, we reason that the PUFA-rich lung environment, surrounding KMLC *in vivo*, may  
14 represent a “ticking bomb” for KM tumors. This is in agreement with our observation that  
15 exogenous palmitate bypasses FASNi-induced cell death and with previous studies showing that  
16 exogenous MUFA confer resistance to ferroptosis (Magtanong et al., 2019). Future studies are  
17 needed to determine whether FA deriving from dietary sources or the tumor microenvironment  
18 could directly influence KMLC tumorigenesis and response to therapy.

19 Our data predict not only that FASNi will be effective in KMLC therapy, but also that other  
20 inducers of ferroptosis may exert selective anti-tumor effects in KMLC. It is noteworthy that TVB-  
21 2640, a FASNi derivative with improved pharmacokinetic properties, is showing promising results  
22 in a phase II trial in KMLC (NCT03808558) and that several other FDA-approved drugs (*e.g.*  
23 sorafenib, sulfasalazine, artesunate, lanperisone) are known to induce ferroptosis in certain cancers

1 (Eling et al., 2015; Gout et al., 2001; Li et al., 2020; Louandre et al., 2013, 2015; Shaw et al., 2011;  
2 Zhang et al., 2019). Therefore, it is likely that cancers other than KMLC rely on FASN and the Lands  
3 cycle to overcome ferroptosis and that this dependency could be exploited in the clinic.

#### 4 **Acknowledgements**

5 The preliminary part of this work was done at UT Southwestern medical Center. CPRIT  
6 RP140672, CPRIT RP1606552, The University of Cincinnati College of Medicine (PPS). Lung  
7 Cancer SPORE (P50CA70907) (JDM, PPS, JWS, KH, IIW), the Harold C. Simmons Cancer  
8 Center through NCI Cancer Center support grant and 2P30CA016672. Cancer Prevention and  
9 Research Institute of Texas CPRIT RP160652 The University of Texas MD Anderson Cancer  
10 Center. YTMA 310 was funded in part by the Yale SPORE in Lung Cancer P50 CA 196530 (PI:  
11 Roy Herbst). We thank Dr. Monte Winslow for kindly providing the murine LSL-*KRAS*<sup>G12D</sup> cell  
12 lines, John M. Shelton for helping set up LMD conditions, Dr. Ken Greis and Dr. Robert Ross at  
13 UC Proteomics and Metabolomics Laboratory to provide guidance and instrumentation for the  
14 HPLC-MS/MS experiments, and Dr. Peter Pathrose for performing KRAS mutation analysis on  
15 human lung cancer samples.

#### 16 **Author contribution**

17 CB and CA equally contributed to this study; CB, CA and PPS designed the study; CB, CA,  
18 GVDV, MM, ACC, DB performed experiments; SB and CA performed bioinformatic analysis;  
19 GVDV and JM gave technical assistance with lipidomic experiments; JM, JDM, KP, BG provided  
20 some key reagents and resources; GK provided TVB-3664 and TVB-2632; SLS provided the  
21 human lung cancer sample; DG provided CT-scans from NCT03808558 trial; KH provided  
22 pathology assistance with YTMA 310; DL performed immunohistochemistry analysis on TMA 4;  
23 MGR, and LSS provided tissue acquisition and pathology assistance with TMA 4; CBe clinical

- 1 database management and HK mutational database acquisition and management (TMA 4); CA,
- 2 CB and PPS wrote the manuscript with comments from all authors.

### 3 **Data availability**

- 4 RNA-seq data were deposited in GEO under the accession number GSE168782.
- 5 All data supporting the findings of this work are available within the article and Supplementary
- 6 Information. Further requests for resources, reagents and data should be directed to and will be
- 7 fulfilled by the corresponding author.

## 1 **References**

- 2 Baenke, F., Peck, B., Miess, H., and Schulze, A. (2013). Hooked on fat: the role of lipid  
3 synthesis in cancer metabolism and tumour development. *Dis Model Mech* 6, 1353–1363.
- 4 Batenburg, J.J. (1992). Surfactant phospholipids: Synthesis and storage. *Am. J. Physiol. - Lung*  
5 *Cell. Mol. Physiol.*
- 6 Bonner, R.F., Emmert-Buck, M., Cole, K., Pohida, T., Chuaqui, R., Goldstein, S., and Liotta,  
7 L.A. (1997). Laser capture microdissection: Molecular analysis of tissue. *Science* (80-. ).
- 8 Boroughs, L.K., and DeBerardinis, R.J. (2015). Metabolic pathways promoting cancer cell  
9 survival and growth. *Nat Cell Biol* 17, 351–359.
- 10 Breitkopf, S.B., Ricoult, S.J.H., Yuan, M., Xu, Y., Peake, D.A., Manning, B.D., and Asara, J.M.  
11 (2017). A relative quantitative positive/negative ion switching method for untargeted lipidomics  
12 via high resolution LC-MS/MS from any biological source. *Metabolomics* 13, 30.
- 13 Canon, J., Rex, K., Saiki, A.Y., Mohr, C., Cooke, K., Bagal, D., Gaida, K., Holt, T., Knutson,  
14 C.G., Koppada, N., et al. (2019). The clinical KRAS(G12C) inhibitor AMG 510 drives anti-  
15 tumour immunity. *Nature*.
- 16 Carbone, D.P., Reck, M., Paz-Ares, L., Creelan, B., Horn, L., Steins, M., Felip, E., Van Den  
17 Heuvel, M.M., Ciuleanu, T.E., Badin, F., et al. (2017). First-line nivolumab in stage IV or  
18 recurrent non-small-cell lung cancer. *N. Engl. J. Med.*
- 19 Carracedo, A., Cantley, L.C., and Pandolfi, P.P. (2013). Cancer metabolism: fatty acid oxidation  
20 in the limelight. *Nat Rev Cancer* 13, 227–232.
- 21 Chen, E.Y., Tan, C.M., Kou, Y., Duan, Q., Wang, Z., Meirelles, G. V., Clark, N.R., and  
22 Ma'ayan, A. (2013). Enrichr: Interactive and collaborative HTML5 gene list enrichment analysis

- 1 tool. BMC Bioinformatics.
- 2 Choi, J., Zhang, W., Gu, X., Chen, X., Hong, L., Laird, J.M., and Salomon, R.G. (2011).
- 3 Lysophosphatidylcholine is generated by spontaneous deacylation of oxidized phospholipids.
- 4 Chem. Res. Toxicol.
- 5 Currie, E., Schulze, A., Zechner, R., Walther, T.C., and Farese Jr., R. V (2013). Cellular fatty
- 6 acid metabolism and cancer. *Cell Metab* *18*, 153–161.
- 7 Dixon, S.J., and Stockwell, B.R. (2019). The Hallmarks of Ferroptosis. *Annu. Rev. Cancer Biol.*
- 8 *3*, 35–54.
- 9 Dixon, S.J., Lemberg, K.M., Lamprecht, M.R., Skouta, R., Zaitsev, E.M., Gleason, C.E., Patel,
- 10 D.N., Bauer, A.J., Cantley, A.M., Yang, W.S., et al. (2012). Ferroptosis: an iron-dependent form
- 11 of nonapoptotic cell death. *Cell* *149*, 1060–1072.
- 12 Dixon, S.J., Winter, G.E., Musavi, L.S., Lee, E.D., Snijder, B., Rebsamen, M., Superti-Furga, G.,
- 13 and Stockwell, B.R. (2015). Human Haploid Cell Genetics Reveals Roles for Lipid Metabolism
- 14 Genes in Nonapoptotic Cell Death. *ACS Chem Biol* *10*, 1604–1609.
- 15 Dobin, A., Davis, C.A., Schlesinger, F., Drenkow, J., Zaleski, C., Jha, S., Batut, P., Chaisson,
- 16 M., and Gingeras, T.R. (2013). STAR: Ultrafast universal RNA-seq aligner. *Bioinformatics*.
- 17 Drummen, G.P.C., Van Liebergen, L.C.M., Op den Kamp, J.A.F., and Post, J.A. (2002). C11-
- 18 BODIPY581/591, an oxidation-sensitive fluorescent lipid peroxidation probe:
- 19 (Micro)spectroscopic characterization and validation of methodology. *Free Radic. Biol. Med.*
- 20 Eling, N., Reuter, L., Hazin, J., Hamacher-Brady, A., and Brady, N.R. (2015). Identification of
- 21 artesunate as a specific activator of ferroptosis in pancreatic cancer cells. *Oncoscience*.
- 22 Fellmann, C., Hoffmann, T., Sridhar, V., Hopfgartner, B., Muhar, M., Roth, M., Lai, D.Y.,

- 1 Barbosa, I.A.M., Kwon, J.S., Guan, Y., et al. (2013). An optimized microRNA backbone for  
2 effective single-copy RNAi. *Cell Rep.*
- 3 Feoktistova, M., Geserick, P., and Leverkus, M. (2016). Crystal violet assay for determining  
4 viability of cultured cells. *Cold Spring Harb. Protoc.*
- 5 Ferrara, P.J., Rong, X., Maschek, J.A., Verkerke, A.R.P., Siripoksup, P., Song, H., Krishnan,  
6 K.C., Johnson, J.M., Turk, J., Houmard, J.A., et al. (2019). The Lands cycle modulates plasma  
7 membrane lipid organization and insulin sensitivity in skeletal muscle. *BioRxiv.*
- 8 Fisher, G.H., Wellen, S.L., Klimstra, D., Lenczowski, J.M., Tichelaar, J.W., Lizak, M.J.,  
9 Whitsett, J.A., Koretsky, A., and Varmus, H.E. (2001). Induction and apoptotic regression of  
10 lung adenocarcinomas by regulation of a K-Ras transgene in the presence and absence of tumor  
11 suppressor genes. *Genes Dev.*
- 12 Gaebler, A., Milan, R., Straub, L., Hoelper, D., Kuerschner, L., and Thiele, C. (2013). Alkyne  
13 lipids as substrates for click chemistry-based in vitro enzymatic assays. *J. Lipid Res.*
- 14 Galan-Cobo, A., Sitthideatphaiboon, P., Qu, X., Poteete, A., Pisegna, M.A., Tong, P., Chen,  
15 P.H., Boroughs, L.K., Rodriguez, M.L.M., Zhang, W., et al. (2019). LKB1 and KEAP1/NRF2  
16 Pathways Cooperatively Promote Metabolic Reprogramming with Enhanced Glutamine  
17 Dependence in KRAS-Mutant Lung Adenocarcinoma. *Cancer Res* 79, 3251–3267.
- 18 Gao, X., and Hannoush, R.N. (2014). Method for cellular imaging of palmitoylated proteins with  
19 clickable probes and proximity ligation applied to hedgehog, tubulin, and ras. *J. Am. Chem. Soc.*
- 20 Garcia, D., and Shaw, R.J. (2017). AMPK: Mechanisms of Cellular Energy Sensing and  
21 Restoration of Metabolic Balance. *Mol. Cell.*
- 22 Gazdar, A.F., Girard, L., Lockwood, W.W., Lam, W.L., and Minna, J.D. (2010). Lung cancer



- 1 cell lines as tools for biomedical discovery and research. *J. Natl. Cancer Inst.*
- 2 Gout, P.W., Buckley, A.R., Simms, C.R., and Bruchofsky, N. (2001). Sulfasalazine, a potent  
3 suppressor of lymphoma growth by inhibition of the x-c cystine transporter: A new action for an  
4 old drug. *Leukemia*.
- 5 Gouw, A.M., Eberlin, L.S., Margulis, K., Sullivan, D.K., Toal, G.G., Tong, L., Zare, R.N., and  
6 Felsher, D.W. (2017). Oncogene KRAS activates fatty acid synthase, resulting in specific ERK  
7 and lipid signatures associated with lung adenocarcinoma. *Proc. Natl. Acad. Sci. U. S. A.*
- 8 Greenshields, A.L., Shepherd, T.G., and Hoskin, D.W. (2017). Contribution of reactive oxygen  
9 species to ovarian cancer cell growth arrest and killing by the anti-malarial drug artesunate. *Mol.*  
10 *Carcinog.*
- 11 Griese, M., Kirmeier, H.G., Liebisch, G., Rauch, D., Stückler, F., Schmitz, G., and Zarbock, R.  
12 (2015). Surfactant lipidomics in healthy children and childhood interstitial lung disease. *PLoS*  
13 *One*.
- 14 Guo, M., Du, Y., Gokey, J.J., Ray, S., Bell, S.M., Adam, M., Sudha, P., Perl, A.K., Deshmukh,  
15 H., Potter, S.S., et al. (2019). Single cell RNA analysis identifies cellular heterogeneity and  
16 adaptive responses of the lung at birth. *Nat. Commun.*
- 17 Hallin, J., Engstrom, L.D., Hargi, L., Calinisan, A., Aranda, R., Briere, D.M., Sudhakar, N.,  
18 Bowcut, V., Baer, B.R., Ballard, J.A., et al. (2020). The KRASG12C inhibitor MRTX849  
19 provides insight toward therapeutic susceptibility of KRAS-mutant cancers in mouse models and  
20 patients. *Cancer Discov.*
- 21 Hanna, V.S., and Hafez, E.A.A. (2018). Synopsis of arachidonic acid metabolism: A review. *J.*  
22 *Adv. Res.*

- 1 Hassannia, B., Vandenabeele, P., and Vanden Berghe, T. (2019). Targeting Ferroptosis to Iron  
2 Out Cancer. *Cancer Cell*.
- 3 Hayes, J.D., and McMahon, M. (2009). NRF2 and KEAP1 mutations: permanent activation of an  
4 adaptive response in cancer. *Trends Biochem. Sci*.
- 5 Holm, B.A., Wang, Z., Egan, E.A., and Notter, R.H. (1996). Content of dipalmitoyl  
6 phosphatidylcholine in lung surfactant: Ramifications for surface activity. *Pediatr. Res*.
- 7 Janes, M.R., Zhang, J., Li, L.S., Hansen, R., Peters, U., Guo, X., Chen, Y., Babbar, A., Firdaus,  
8 S.J., Darjania, L., et al. (2018). Targeting KRAS Mutant Cancers with a Covalent G12C-Specific  
9 Inhibitor. *Cell*.
- 10 Kagan, V.E., Mao, G., Qu, F., Angeli, J.P.F., Doll, S., Croix, C.S., Dar, H.H., Liu, B., Tyurin,  
11 V.A., Ritov, V.B., et al. (2017). Oxidized arachidonic and adrenic PEs navigate cells to  
12 ferroptosis. *Nat. Chem. Biol*.
- 13 Källback, P., Nilsson, A., Shariatgorji, M., and Andrén, P.E. (2016). MsiQuant - Quantitation  
14 Software for Mass Spectrometry Imaging Enabling Fast Access, Visualization, and Analysis of  
15 Large Data Sets. *Anal. Chem*.
- 16 Kamphorst, J.J., Cross, J.R., Fan, J., de Stanchina, E., Mathew, R., White, E.P., Thompson, C.B.,  
17 and Rabinowitz, J.D. (2013a). Hypoxic and Ras-transformed cells support growth by scavenging  
18 unsaturated fatty acids from lysophospholipids. *Proc Natl Acad Sci U S A* *110*, 8882–8887.
- 19 KENNEDY, E.P., and WEISS, S.B. (1956). The function of cytidine coenzymes in the  
20 biosynthesis of phospholipides. *J. Biol. Chem*.
- 21 Kim, R.S., and LaBella, F.S. (1987). Comparison of analytical methods for monitoring  
22 autoxidation profiles of authentic lipids. *J. Lipid Res*.

- 1 Kolb, H.C., and Sharpless, K.B. (2003). The growing impact of click chemistry on drug  
2 discovery. *Drug Discov. Today*.
- 3 Konstantinidou, G., Bey, E.A., Rabellino, A., Schuster, K., Maira, M.S., Gazdar, A.F., Amici,  
4 A., Boothman, D.A., and Scaglioni, P.P. (2009). Dual phosphoinositide 3-kinase/mammalian  
5 target of rapamycin blockade is an effective radiosensitizing strategy for the treatment of non-  
6 small cell lung cancer harboring K-RAS mutations. *Cancer Res* 69, 7644–7652.
- 7 Konstantinidou, G., Ramadori, G., Torti, F., Kangasniemi, K., Ramirez, R.E., Cai, Y., Behrens,  
8 C., Dellinger, M.T., Brekken, R.A., Wistuba, I.I., et al. (2013). RHOA-FAK is a required  
9 signaling axis for the maintenance of KRAS-driven lung adenocarcinomas. *Cancer Discov.*
- 10 Kounakis, K., Chaniotakis, M., Markaki, M., and Tavernarakis, N. (2019). Emerging roles of  
11 lipophagy in health and disease. *Front. Cell Dev. Biol.*
- 12 Kuleshov, M. V., Jones, M.R., Rouillard, A.D., Fernandez, N.F., Duan, Q., Wang, Z., Koplev,  
13 S., Jenkins, S.L., Jagodnik, K.M., Lachmann, A., et al. (2016). Enrichr: a comprehensive gene  
14 set enrichment analysis web server 2016 update. *Nucleic Acids Res.*
- 15 Kwong, S.C., Jamil, A.H.A., Rhodes, A., Taib, N.A., and Chung, I. (2019). Metabolic role of  
16 fatty acid binding protein 7 in mediating triple-negative breast cancer cell death via PPAR- $\alpha$   
17 signaling. *J. Lipid Res.*
- 18 Kyle, J.E., Clair, G., Bandyopadhyay, G., Misra, R.S., Zink, E.M., Bloodsworth, K.J., Shukla,  
19 A.K., Du, Y., Lillis, J., Myers, J.R., et al. (2018). Cell type-resolved human lung lipidome  
20 reveals cellular cooperation in lung function. *Sci. Rep.*
- 21 Lands, W.E. (1960). Metabolism of glycerolipids. 2. The enzymatic acylation of lysolecithin. *J*  
22 *Biol Chem* 235, 2233–2237.

- 1 Leek, J.T., Johnson, W.E., Parker, H.S., Jaffe, A.E., and Storey, J.D. (2012). The SVA package  
2 for removing batch effects and other unwanted variation in high-throughput experiments.  
3 *Bioinformatics*.
- 4 Li, J., Cao, F., Yin, H. liang, Huang, Z. jian, Lin, Z. tao, Mao, N., Sun, B., and Wang, G. (2020).  
5 Ferroptosis: past, present and future. *Cell Death Dis*.
- 6 Liao, Y., Smyth, G.K., and Shi, W. (2014). FeatureCounts: An efficient general purpose program  
7 for assigning sequence reads to genomic features. *Bioinformatics*.
- 8 Lin, R., Zhang, Z., Chen, L., Zhou, Y., Zou, P., Feng, C., Wang, L., and Liang, G. (2016).  
9 Dihydroartemisinin (DHA) induces ferroptosis and causes cell cycle arrest in head and neck  
10 carcinoma cells. *Cancer Lett*.
- 11 Liu, H., Schreiber, S.L., and Stockwell, B.R. (2018). Targeting Dependency on the GPX4 Lipid  
12 Peroxide Repair Pathway for Cancer Therapy. *Biochemistry*.
- 13 Louandre, C., Ezzoukhry, Z., Godin, C., Barbare, J.C., Mazière, J.C., Chauffert, B., and  
14 Galmiche, A. (2013). Iron-dependent cell death of hepatocellular carcinoma cells exposed to  
15 sorafenib. *Int. J. Cancer*.
- 16 Louandre, C., Marcq, I., Bouhlal, H., Lachaier, E., Godin, C., Saidak, Z., François, C., Chatelain,  
17 D., Debuysscher, V., Barbare, J.C., et al. (2015). The retinoblastoma (Rb) protein regulates  
18 ferroptosis induced by sorafenib in human hepatocellular carcinoma cells. *Cancer Lett*.
- 19 Love, M.I., Huber, W., and Anders, S. (2014). Moderated estimation of fold change and  
20 dispersion for RNA-seq data with DESeq2. *Genome Biol*.
- 21 Magtanong, L., Ko, P.J., To, M., Cao, J.Y., Forcina, G.C., Tarangelo, A., Ward, C.C., Cho, K.,  
22 Patti, G.J., Nomura, D.K., et al. (2019). Exogenous Monounsaturated Fatty Acids Promote a

- 1 Ferroptosis-Resistant Cell State. *Cell Chem. Biol.*
- 2 McCormick, F. (2019). Progress in targeting RAS with small molecule drugs. *Biochem. J.*
- 3 Padanad, M.S., Konstantinidou, G., Venkateswaran, N., Melegari, M., Rindhe, S., Mitsche, M.,  
4 Yang, C., Batten, K., Huffman, K.E., Liu, J., et al. (2016). Fatty Acid Oxidation Mediated by  
5 Acyl-CoA Synthetase Long Chain 3 Is Required for Mutant KRAS Lung Tumorigenesis. *Cell*  
6 *Rep.*
- 7 Pap, E.H.W., Drummen, G.P.C., Winter, V.J., Kooij, T.W.A., Rijken, P., Wirtz, K.W.A., Op Den  
8 Kamp, J.A.F., Hage, W.J., and Post, J.A. (1999). Ratio-fluorescence microscopy of lipid  
9 oxidation in living cells using C11-BODIPY(581/591). *FEBS Lett.*
- 10 Pelosof, R., Fairchild, L., Huang, C.H., Widmer, C., Sreedharan, V.T., Sinha, N., Lai, D.Y.,  
11 Guan, Y., Premssirut, P.K., Tschaharganeh, D.F., et al. (2017). Prediction of potent shRNAs with  
12 a sequential classification algorithm. *Nat. Biotechnol.*
- 13 Pérez, R., Matabosch, X., Llebaria, A., Balboa, M.A., and Balsinde, J. (2006). Blockade of  
14 arachidonic acid incorporation into phospholipids induces apoptosis in U937 promonocytic cells.  
15 *J. Lipid Res.*
- 16 Phelps, R.M., Johnson, B.E., Ihde, D.C., Gazdar, A.F., Carbone, D.P., McClintock, P.R.,  
17 Linnoila, R.I., Matthews, M.J., Bunn Jr., P.A., Carney, D., et al. (1996). NCI-Navy Medical  
18 Oncology Branch cell line data base. *J Cell Biochem Suppl* 24, 32–91.
- 19 Politi, K., Zakowski, M.F., Fan, P.D., Schonfeld, E.A., Pao, W., and Varmus, H.E. (2006). Lung  
20 adenocarcinomas induced in mice by mutant EGF receptors found in human lung cancers  
21 respond to a tyrosine kinase inhibitor or to down-regulation of the receptors. *Genes Dev.*
- 22 Poursaitidis, I., Wang, X., Crighton, T., Labuschagne, C., Mason, D., Cramer, S.L., Triplett, K.,

- 1 Roy, R., Pardo, O.E., Seckl, M.J., et al. (2017). Oncogene-Selective Sensitivity to Synchronous
- 2 Cell Death following Modulation of the Amino Acid Nutrient Cystine. *Cell Rep.*
- 3 Prior, I.A., Hood, F.E., and Hartley, J.L. (2020). The Frequency of Ras Mutations in Cancer.
- 4 *Cancer Res.*
- 5 Quehenberger, O., Armando, A.M., and Dennis, E.A. (2011). High sensitivity quantitative
- 6 lipidomics analysis of fatty acids in biological samples by gas chromatography-mass
- 7 spectrometry. *Biochim. Biophys. Acta - Mol. Cell Biol. Lipids.*
- 8 Ramirez, R.D., Sheridan, S., Girard, L., Sato, M., Kim, Y., Pollack, J., Peyton, M., Zou, Y.,
- 9 Kurie, J.M., DiMaio, J.M., et al. (2004). Immortalization of human bronchial epithelial cells in
- 10 the absence of viral oncoproteins. *Cancer Res.*
- 11 Reck, M., Rodriguez-Abreu, D., Robinson, A.G., Hui, R., Csöszi, T., Fülöp, A., Gottfried, M.,
- 12 Peled, N., Tafreshi, A., Cuffe, S., et al. (2016). Pembrolizumab versus Chemotherapy for PD-L1-
- 13 Positive Non-Small-Cell Lung Cancer. *N. Engl. J. Med.*
- 14 Robichaud, P.P., Poirier, S.J., Boudreau, L.H., Doiron, J.A., Barnett, D.A., Boilard, E., and
- 15 Surette, M.E. (2016). On the cellular metabolism of the click chemistry probe 19-alkyne
- 16 arachidonic acid. *J. Lipid Res.*
- 17 Rohrig, F., and Schulze, A. (2016). The multifaceted roles of fatty acid synthesis in cancer. *Nat*
- 18 *Rev Cancer* *16*, 732–749.
- 19 Romero, R., Sayin, V.I., Davidson, S.M., Bauer, M.R., Singh, S.X., Leboeuf, S.E., Karakousi,
- 20 T.R., Ellis, D.C., Bhutkar, A., Sánchez-Rivera, F.J., et al. (2017). Keap1 loss promotes Kras-
- 21 driven lung cancer and results in dependence on glutaminolysis. *Nat. Med.*
- 22 Rowbotham, S.P., and Kim, C.F. (2014). Diverse cells at the origin of lung adenocarcinoma.

- 1 Proc. Natl. Acad. Sci. U. S. A.
- 2 Saliakoura, M., Reynoso-Moreno, I., Pozzato, C., Rossi Sebastiano, M., Galié, M., Gertsch, J.,  
3 and Konstantinidou, G. (2020). The ACSL3-LPIAT1 signaling drives prostaglandin synthesis in  
4 non-small cell lung cancer. *Oncogene*.
- 5 Santana-Codina, N., Chandhoke, A.S., Yu, Q., Małachowska, B., Kuljanin, M., Gikandi, A.,  
6 Stańczak, M., Gableske, S., Jedrychowski, M.P., Scott, D.A., et al. (2020). Defining and  
7 Targeting Adaptations to Oncogenic KRASG12C Inhibition Using Quantitative Temporal  
8 Proteomics. *Cell Rep*.
- 9 Shaw, A.T., Winslow, M.M., Magendantz, M., Ouyang, C., Dowdle, J., Subramanian, A., Lewis,  
10 T.A., Maglathin, R.L., Tolliday, N., and Jacks, T. (2011). Selective killing of K-ras mutant  
11 cancer cells by small molecule inducers of oxidative stress. *Proc. Natl. Acad. Sci. U. S. A.*
- 12 Sunaga, N., Shames, D.S., Girard, L., Peyton, M., Larsen, J.E., Imai, H., Soh, J., Sato, M.,  
13 Yanagitani, N., Kaira, K., et al. (2011). Knockdown of oncogenic KRAS in non-small cell lung  
14 cancers suppresses tumor growth and sensitizes tumor cells to targeted therapy. *Mol Cancer Ther*  
15 *10*, 336–346.
- 16 Surette, M.E., Fonteh, A.N., Bernatchez, C., and Chilton, F.H. (1999). Perturbations in the  
17 control of cellular arachidonic acid levels block cell growth and induce apoptosis in HL-60 cells.  
18 *Carcinogenesis*.
- 19 Tarangelo, A., Magtanong, L., Biegging-Rolett, K.T., Li, Y., Ye, J., Attardi, L.D., and Dixon, S.J.  
20 (2018). p53 Suppresses Metabolic Stress-Induced Ferroptosis in Cancer Cells. *Cell Rep*.
- 21 Tomasini, P., Walia, P., Labbe, C., Jao, K., and Leighl, N.B. (2016). Targeting the KRAS  
22 Pathway in Non-Small Cell Lung Cancer. *Oncologist*.

- 1 Ubellacker, J.M., Tasdogan, A., Ramesh, V., Shen, B., Mitchell, E.C., Martin-Sandoval, M.S.,
- 2 Gu, Z., McCormick, M.L., Durham, A.B., Spitz, D.R., et al. (2020). Lymph protects
- 3 metastasizing melanoma cells from ferroptosis. *Nature*.
- 4 Vale, G., Martin, S.A., Mitsche, M.A., Thompson, B.M., Eckert, K.M., and McDonald, J.G.
- 5 (2019). Three-phase liquid extraction: A simple and fast method for lipidomic workflows. *J.*
- 6 *Lipid Res.*
- 7 Viswanathan, V.S., Ryan, M.J., Dhruv, H.D., Gill, S., Eichhoff, O.M., Seashore-Ludlow, B.,
- 8 Kaffenberger, S.D., Eaton, J.K., Shimada, K., Aguirre, A.J., et al. (2017). Dependency of a
- 9 therapy-resistant state of cancer cells on a lipid peroxidase pathway. *Nature*.
- 10 Wang, B., and Tontonoz, P. (2019). Phospholipid Remodeling in Physiology and Disease. *Annu.*
- 11 *Rev. Physiol.*
- 12 Winslow, M.M., Dayton, T.L., Verhaak, R.G.W., Kim-Kiselak, C., Snyder, E.L., Feldser, D.M.,
- 13 Hubbard, D.D., Dupage, M.J., Whittaker, C.A., Hoersch, S., et al. (2011). Suppression of lung
- 14 adenocarcinoma progression by Nkx2-1. *Nature*.
- 15 Yagoda, N., Von Rechenberg, M., Zaganjor, E., Bauer, A.J., Yang, W.S., Fridman, D.J.,
- 16 Wolpaw, A.J., Smukste, I., Peltier, J.M., Boniface, J.J., et al. (2007). RAS-RAF-MEK-dependent
- 17 oxidative cell death involving voltage-dependent anion channels. *Nature*.
- 18 Yang, W.S., and Stockwell, B.R. (2008). Synthetic Lethal Screening Identifies Compounds
- 19 Activating Iron-Dependent, Nonapoptotic Cell Death in Oncogenic-RAS-Harboring Cancer
- 20 Cells. *Chem. Biol.*
- 21 Yang, W.S., Sriramaratnam, R., Welsch, M.E., Shimada, K., Skouta, R., Viswanathan, V.S.,
- 22 Cheah, J.H., Clemons, P.A., Shamji, A.F., Clish, C.B., et al. (2014). Regulation of ferroptotic



- 1 cancer cell death by GPX4. *Cell*.
- 2 Yang, W.S., Kim, K.J., Gaschler, M.M., Patel, M., Shchepinov, M.S., and Stockwell, B.R.  
3 (2016). Peroxidation of polyunsaturated fatty acids by lipoxygenases drives ferroptosis. *Proc.*  
4 *Natl. Acad. Sci. U. S. A.*
- 5 Yao, H., and Ye, J. (2008). Long chain acyl-CoA synthetase 3-mediated phosphatidylcholine  
6 synthesis is required for assembly of very low density lipoproteins in human hepatoma Huh7  
7 cells. *J Biol Chem* 283, 849–854.
- 8 Zechner, R., Zimmermann, R., Eichmann, T.O., Kohlwein, S.D., Haemmerle, G., Lass, A., and  
9 Madeo, F. (2012). FAT SIGNALS - Lipases and lipolysis in lipid metabolism and signaling. *Cell*  
10 *Metab.*
- 11 Zhang, Y., Tan, H., Daniels, J.D., Zandkarimi, F., Liu, H., Brown, L.M., Uchida, K., O'Connor,  
12 O.A., and Stockwell, B.R. (2019). Imidazole Ketone Erastin Induces Ferroptosis and Slows  
13 Tumor Growth in a Mouse Lymphoma Model. *Cell Chem. Biol.* 26, 623-633.e9.
- 14 Zhao, Y., Chen, Y., Bonacci, T.M., Brecht, D.S., Li, S., Bensch, W.R., Moller, D.E., Kowala, M.,  
15 Konrad, R.J., and Cao, G. (2008). Identification and characterization of a  
16 lysophosphatidylcholine acyltransferase that is primarily expressed in metabolic tissues. *J. Biol.*  
17 *Chem.*
- 18 Zheng, J., and Conrad, M. (2020). The Metabolic Underpinnings of Ferroptosis. *Cell Metab.*  
19  
20

1 **Figure legends**

2 **Figure 1. KMLC has a specific lipidome in mouse and human samples (A, B)** Lipidomic analysis  
3 of murine TetO-*Kras*<sup>G12D</sup> tumors (n=4), TetO-*EGFR*<sup>L858R</sup> (n=3) and unaffected healthy lung (n=3).  
4 Each dot indicates a lung/tumor section. Data are expressed as mean ± SD. PC,  
5 phosphatidylcholines; TAG, triglycerides; PE, phosphatidylethanolamines; CE, cholesteryl-esters;  
6 PI, phosphatidylinositols; DAG, diacylglycerides; SM, sphingomyelins; Cer, ceramides; LysoPC,  
7 lysophosphatidylcholines. Volcano plots in (B) show the lipid classes that are differentially  
8 represented for each comparison. The adjusted P value and difference were calculated using  
9 multiple t tests with alpha =0.05. (C) MS/MS and (D) MALDI imaging analyses showing lipid  
10 differentially represented in TetO-*Kras*<sup>G12D</sup> tumors as compared to unaffected healthy lung. (E)  
11 Representative pictures of MALDI imaging analysis of lung cancer patient-derived xenografts  
12 (PDXs) and primary human lung cancer specimens of the indicated genotype. (F, G) HLPC-  
13 MS/MS analysis of lung cancer PDXs and primary human lung cancer specimens of the indicated  
14 genotype. Volcano plots show lipid species identified by HLPC-MS/MS differentially represented  
15 in KM *versus* KRAS-WT samples (PDXs, KM n=5 and KRAS-WT n=4; lung cancer patients,  
16 n=3/group). P values and difference were calculated using multiple t tests (p<0.05). In (D) and (E)  
17 rainbow scale represents ion intensity normalized against the total ion count (%) and black circles  
18 represent the major tumor areas.

19 **Figure 2. KM is required to induce dependency on FASN. (A)** Viability assay of human LC  
20 derived cell lines. Cell line, genotype and treatments are indicated. LF: lung fibroblasts. (B) Cell  
21 cycle analysis of H460 and H522 cells, as representative examples of KM and KRAS-WT LC cells,  
22 treated as indicated. (C) Immunoblot of FASN, SCD1 and pan-RAS in H522 and H661 cells  
23 transduced as indicated. (D) Oil red O staining, relative steady-state quantification of palmitate (FA

1 16:0) (E) and crystal violet assay (F) of H522 and H522-KM cells treated as indicated. (G)  
2 Immunoblot of FASN and KRAS in H460 and A549 cells transduced with doxy-inducible shRNAs  
3 targeting *KRAS*. (H) MTT viability assay of H460 and A549 cells treated with FASNi before and  
4 after induction of *KRAS* knock-down. (I) MTT viability assay of H2122, H1373 and HCC-44 cells  
5 (*KRAS<sup>G12C</sup>* mutant) treated with FASNi alone or in combination with the *KRAS<sup>G12C</sup>* inhibitor ARS-  
6 1620. Data are expressed as mean  $\pm$  SD. In (E) Student t test with \*\*\*\* $p < 0.0001$ . In (J) one-way  
7 ANOVA followed by Tukey's multiple comparison test with \*\*\* $p < 0.001$  and \*\*\*\* $p < 0.0001$ .

8 **Figure 3. FASNi inhibits fatty acid synthesis and  $\beta$ -oxidation in both KM and KRAS-WT cells.**  
9 (A) GC/MS quantification of newly synthesized FA in H460 and H522 cells after overnight ethyl  
10 acetate-2-<sup>13</sup>C labelling, treated as indicated. Either M+2/M+0 or M+4/M+0 ratio is reported.  
11 Palmitate, FA 16:0; palmitoleate, FA 16:1n7; vaccenate, FA 18:1n7; oleate, FA 18:1n9 (n=3  
12 independent experiments). (B, C) Relative quantification of malonyl-CoA and NAPH of vehicle-  
13 and FASNi-treated LC cells (n=3 independent experiments). (D) Oil red O staining for lipid droplets  
14 in H460 and H522 cells. (E, F) Relative quantification of FA  $\beta$ -oxidation (FAO) and AMP in the  
15 indicated cells treated with vehicle or FASNi. (G) Immunoblot of phospho-Ser79-ACC1  
16 (pACC1<sup>S79</sup>), ACC1, FASN, phosphor-Thr172-AMPK (pAMPK<sup>T172</sup>) and AMPK. (H) Schematic of  
17 the AMPK/ACC1/FASN axis. FASNi inhibits the synthesis of palmitate (FA 16:0) thereby  
18 blocking the synthesis of complex lipids and  $\beta$ -oxidation (FAO) . These events trigger the  
19 activation of AMPK which in turn phosphorylates and deactivates ACC1. ACC1 phosphorylation  
20 blocks the synthesis of malonyl-CoA (the substrate for FA 16:0 synthesis) potentiating the  
21 inhibitory effects of FASNi. Bars express mean  $\pm$  SD. Statistical analyses were done using two-  
22 tailed unpaired Student's t test, \* $p < 0.05$ , \*\* $p < 0.01$ , \*\*\* $p < 0.001$  and \*\*\*\* $p < 0.0001$ .

1 **Figure 4. FASNi induces accumulation of PUFA-PC and PUFA-LysoPC in KMLC. (A)**  
2 Variation of the lipid classes identified by MS/MS in KM and KRAS-WT LC cells. Bars represents  
3 Log (fold change) of FASNi treatment over vehicle control. **(B)** Volcano plots of multiple t tests  
4 representing the significant changes in lipid classes for the indicated comparisons (cutoff adj p<0.05).  
5 **(C-H)** Relative double bonds quantification in the indicated lipid classes and volcano plots showing  
6 the correspondent multiple t tests (cutoff adj p<0.05).

7 **Figure 5. FASN and the Lands cycle limit PUFA content of phospholipids of KMLC. (A, B)**  
8 Quantification of total (A) and newly synthesized (B) arachidonic acid (FA 20:4) in the PL fraction  
9 of the indicated cell lines. Tracer incorporation was measured after 7-hour incubation with Ethyl  
10 Acetate-1,2 <sup>13</sup>C<sub>2</sub>. **(C, D)** Incorporation of arachidonic acid (AA) alkyne in the indicated cell lines  
11 treated as indicated, and its quantification. n=20-42 cells/sample. **(E)** Venn Diagram of the  
12 “metabolism of lipids and lipoproteins” (R-HSA-556833) genes upregulated in KM (H460, A549)  
13 and KRAS-WT (H661, H522) LC cells treated with FASNi. **(F, G)** Gene expression volcano plot  
14 and top KEGG pathways specifically upregulated in KMLC cells upon FASNi treatment. **(H, I)**  
15 Cell viability after siRNA-mediated knockdown of the indicated genes. Venn diagram summarizes  
16 lethal genes specific for KMLC cells (H460, A549, Dunnett’s multiple comparison test with cutoff  
17 adj P<0.05). **(J, K)** Quantification of newly synthesized- palmitate (FA 16:0) and total arachidonic  
18 acid (FA 20:4) in the PL fraction of indicated cell lines after shRNA-mediated knockdown of  
19 lysophosphatidylcholine acyltransferase 3 (*LPCAT3*) or phospholipase A2 group IVC (*PLA2G4C*).  
20 **(L, M)** Working model explaining the role of FASN in the regulation of the Lands cycle in KMLC.  
21 FASN is active: KM induces ROS that oxidize the PUFA acyl chain on PC. PLA2 removes the  
22 oxidized fatty acid (FA) on PC synthesizing a LysoPC. FASN and SCD1 produce saturated FA  
23 (SFA) and MUFA, respectively. SFA/MUFA are transferred to CoA by ACSL3. These acyl-CoAs

1 are used by LPCAT3 to re-acylate the LysoPC forming again PC. Inhibition of FASN (J) causes  
2 the depletion of SFA/MUFA and uptake of exogenous PUFA for the re-acylation of LysoPC. This  
3 process increases the amount of PUFA-PC and PUFA-LysoPC which are oxidized under oxidative  
4 stress (oxPUFA-PC and oxPUFA-LysoPC). Accumulation of these lipid species leads to cell death  
5 via ferroptosis. Bars represent mean  $\pm$  SD. In (A,B), (D), (J, K) Statistical analyses were done using  
6 two-tailed unpaired Student's t test with ns, not significant, \* $p < 0.05$ , \*\* $p < 0.01$  and \*\*\* $p < 0.001$ .

7 **Figure 6. FASN and the Lands cycle are required to deflect ferroptosis in KMLC. (A, D)** C11-  
8 BODIPY staining in KM, KRAS-WT, and H522-KM LC cells. Oxidized and reduced C11-  
9 BODIPY are indicated in red and green, respectively. Bars indicate the relative C11-BODIPY  
10 oxidation (n, number of cells). **(E)** Schematic of the GPX4 axis of ferroptosis and some of its  
11 regulators. Red=pro-ferroptosis; Green=anti-ferroptosis. NAC, N-acetyl cysteine; GSH,  
12 glutathione; GSSG, glutathione disulfide; ML162, GPX4 inhibitor; Fer-1, ferrostatin-1; PUFA,  
13 Polyunsaturated fatty acids; OxPUFA, oxidized PUFA; PL, phospholipids; MUFA,  
14 monounsaturated fatty acids; SFA, saturated fatty acids; LA, linoleic acid; PC,  
15 phosphatidylcholine. **(F, G)** C11-BODIPY rescue experiments in the indicated cell lines and their  
16 quantification. **(H, I)** C11-BODIPY stain on A549 cell line transfected with the indicated siRNAs  
17 (48hrs post transfection) and their quantification. Numbers in the bars indicate number of cells.  
18 Bars represent mean  $\pm$  SD. In (B) and (D) two-tailed unpaired student t test, in (G) multiple t tests  
19 with ns,  $p > 0.05$ ; \* $p < 0.05$ ; \*\* $p < 0.01$ ; \*\*\* $p < 0.001$ ; \*\*\*\* $p < 0.0001$ .

20 **Figure 7. FASNi is effective in KMLC *in vivo*. (A, B)** Representative H&E pictures of the lungs  
21 of TetO-*Kras* mice treated as indicated and tumor burden quantification. n=number of mice. **(C, D)**  
22 *In vivo* growth curves and post-resection pictures of H460 and A549 xenografts in NOD/SCID mice  
23 treated as indicated. **(E-G)** Representative pictures of C11-BODIPY staining of the lungs of TetO-

1 *Kras* and of H460 xenografts, and their quantification. Dotted circles in (E) indicate lung tumor. **(H)**  
2 Volcano plot showing lipid species identified by MS/MS differentially represented in FASNi  
3 *versus* vehicle (n=5 mice/group). P values and difference were calculated using multiple t tests  
4 ( $p < 0.05$ ). **(I)** Serial CT-scans of a representative lung cancer patient enrolled in the NCT03808558  
5 clinical trial with the FASNi derivative TVB-2640 (modified to improve pharmacokinetic  
6 properties in humans). Note the 30% reduction of estimated tumor volume after 8 weeks of  
7 treatment.

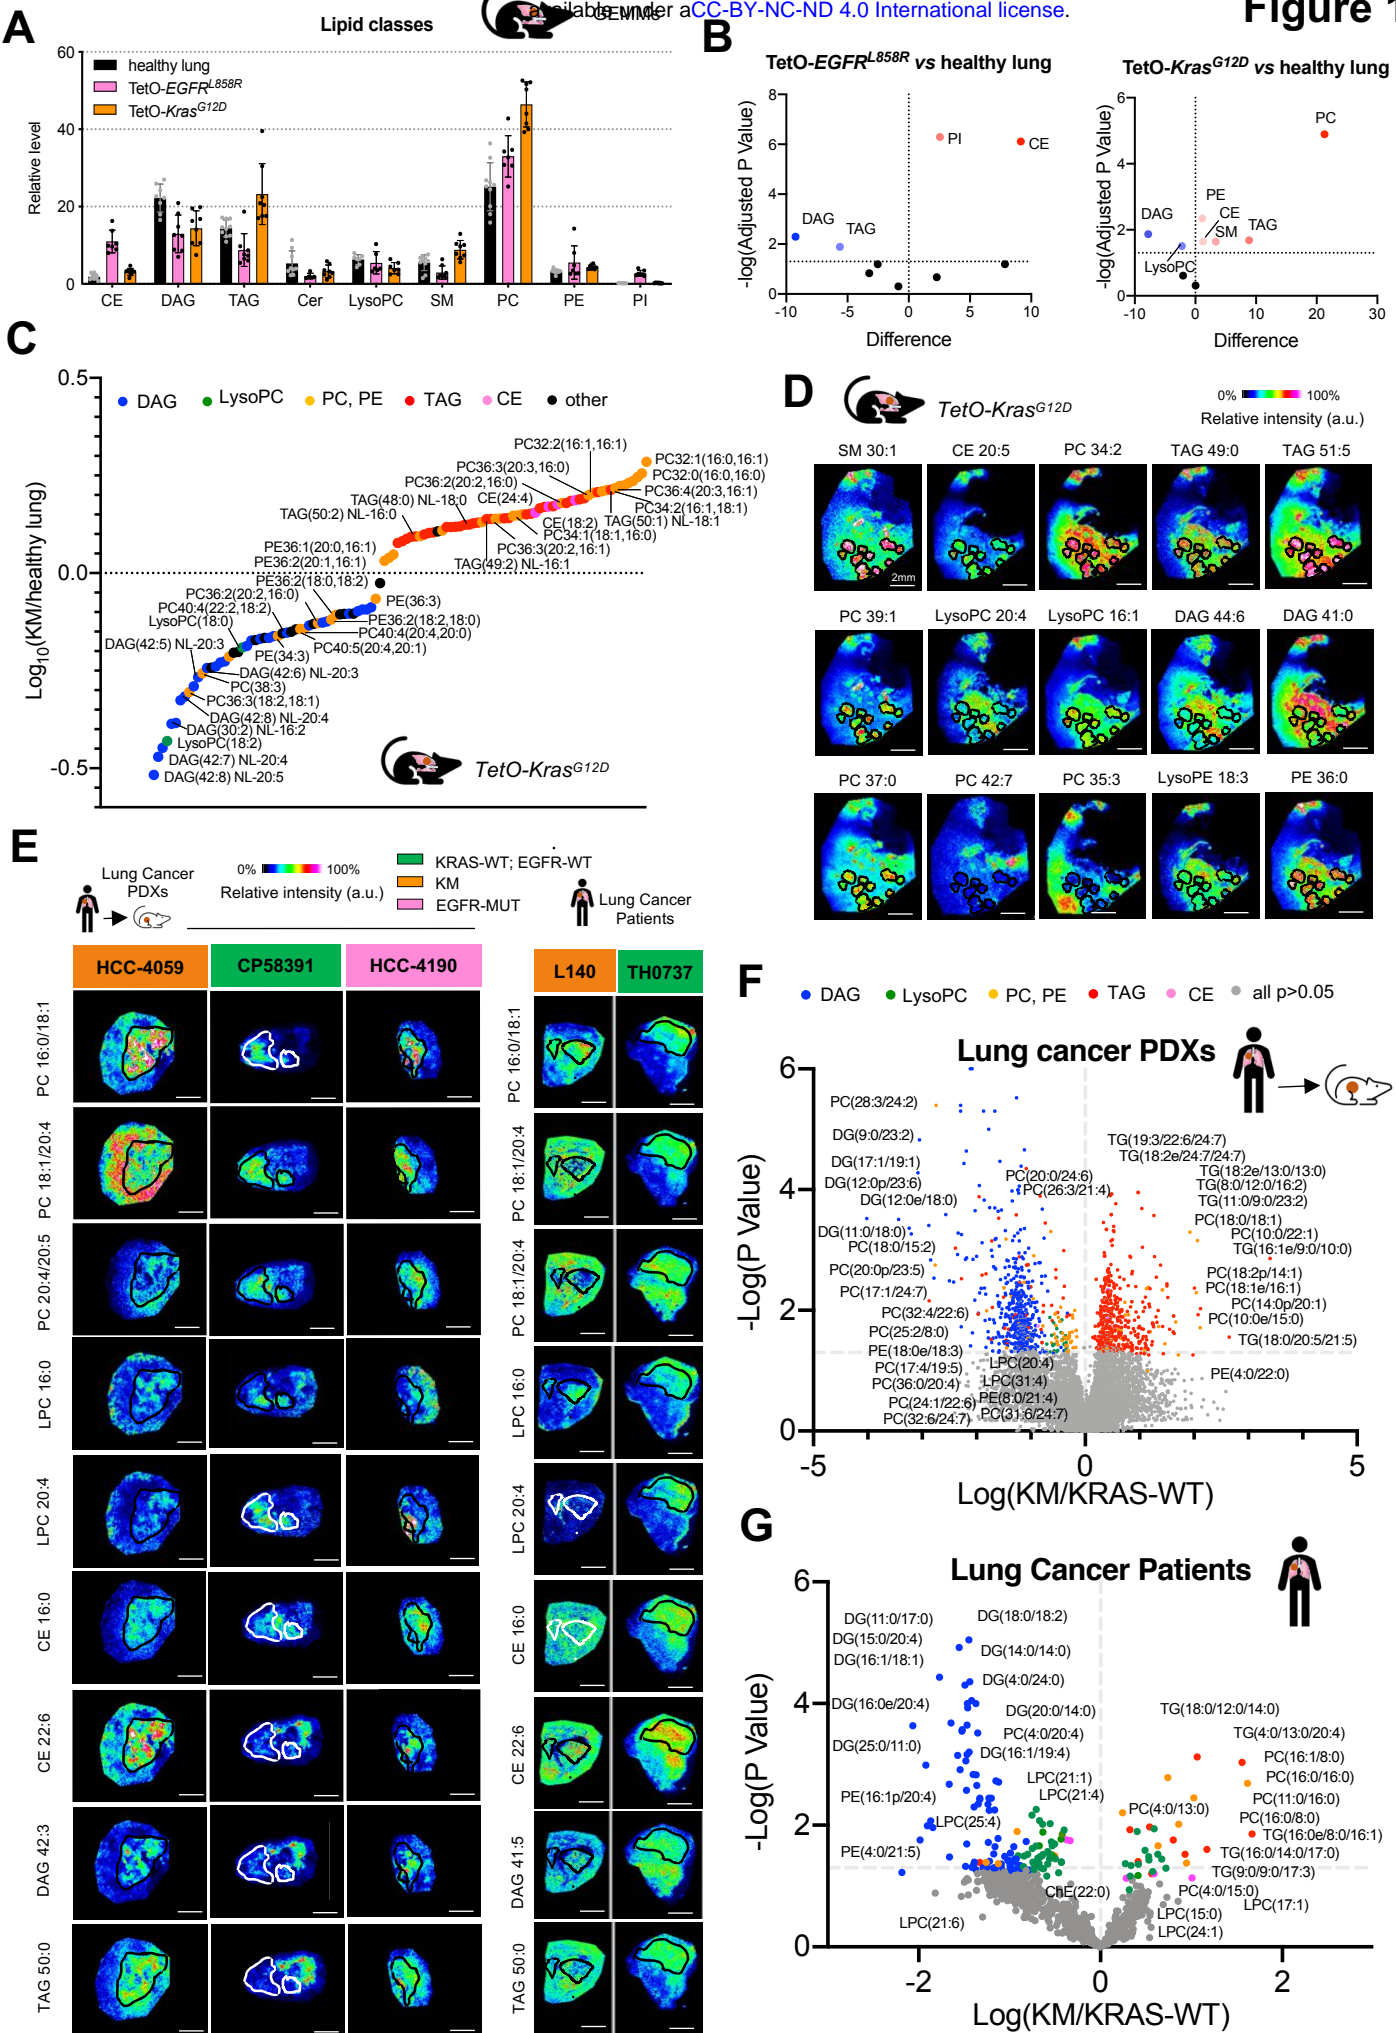

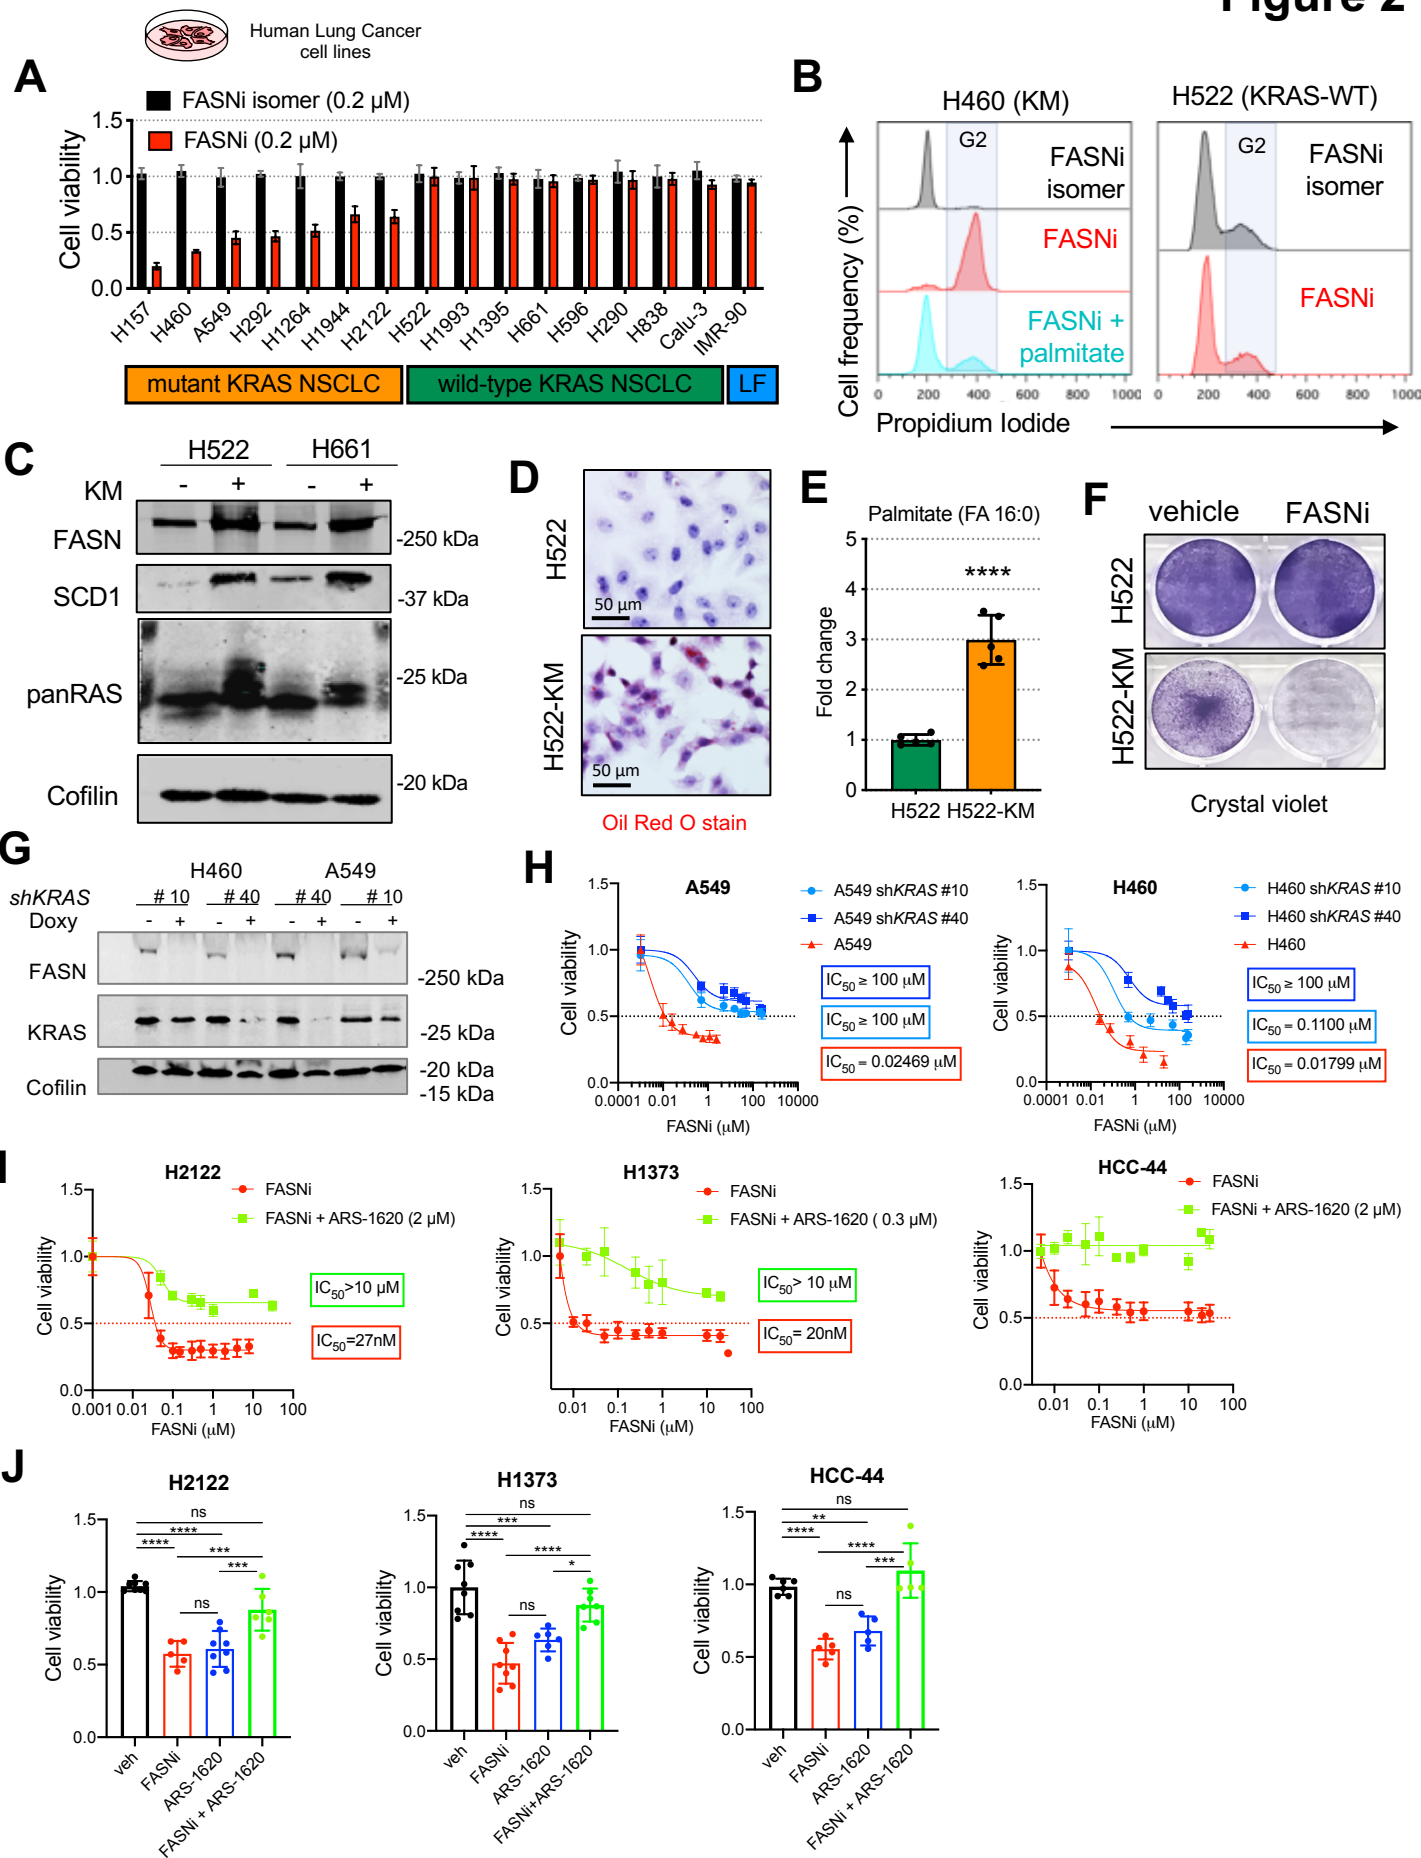



# Figure 3

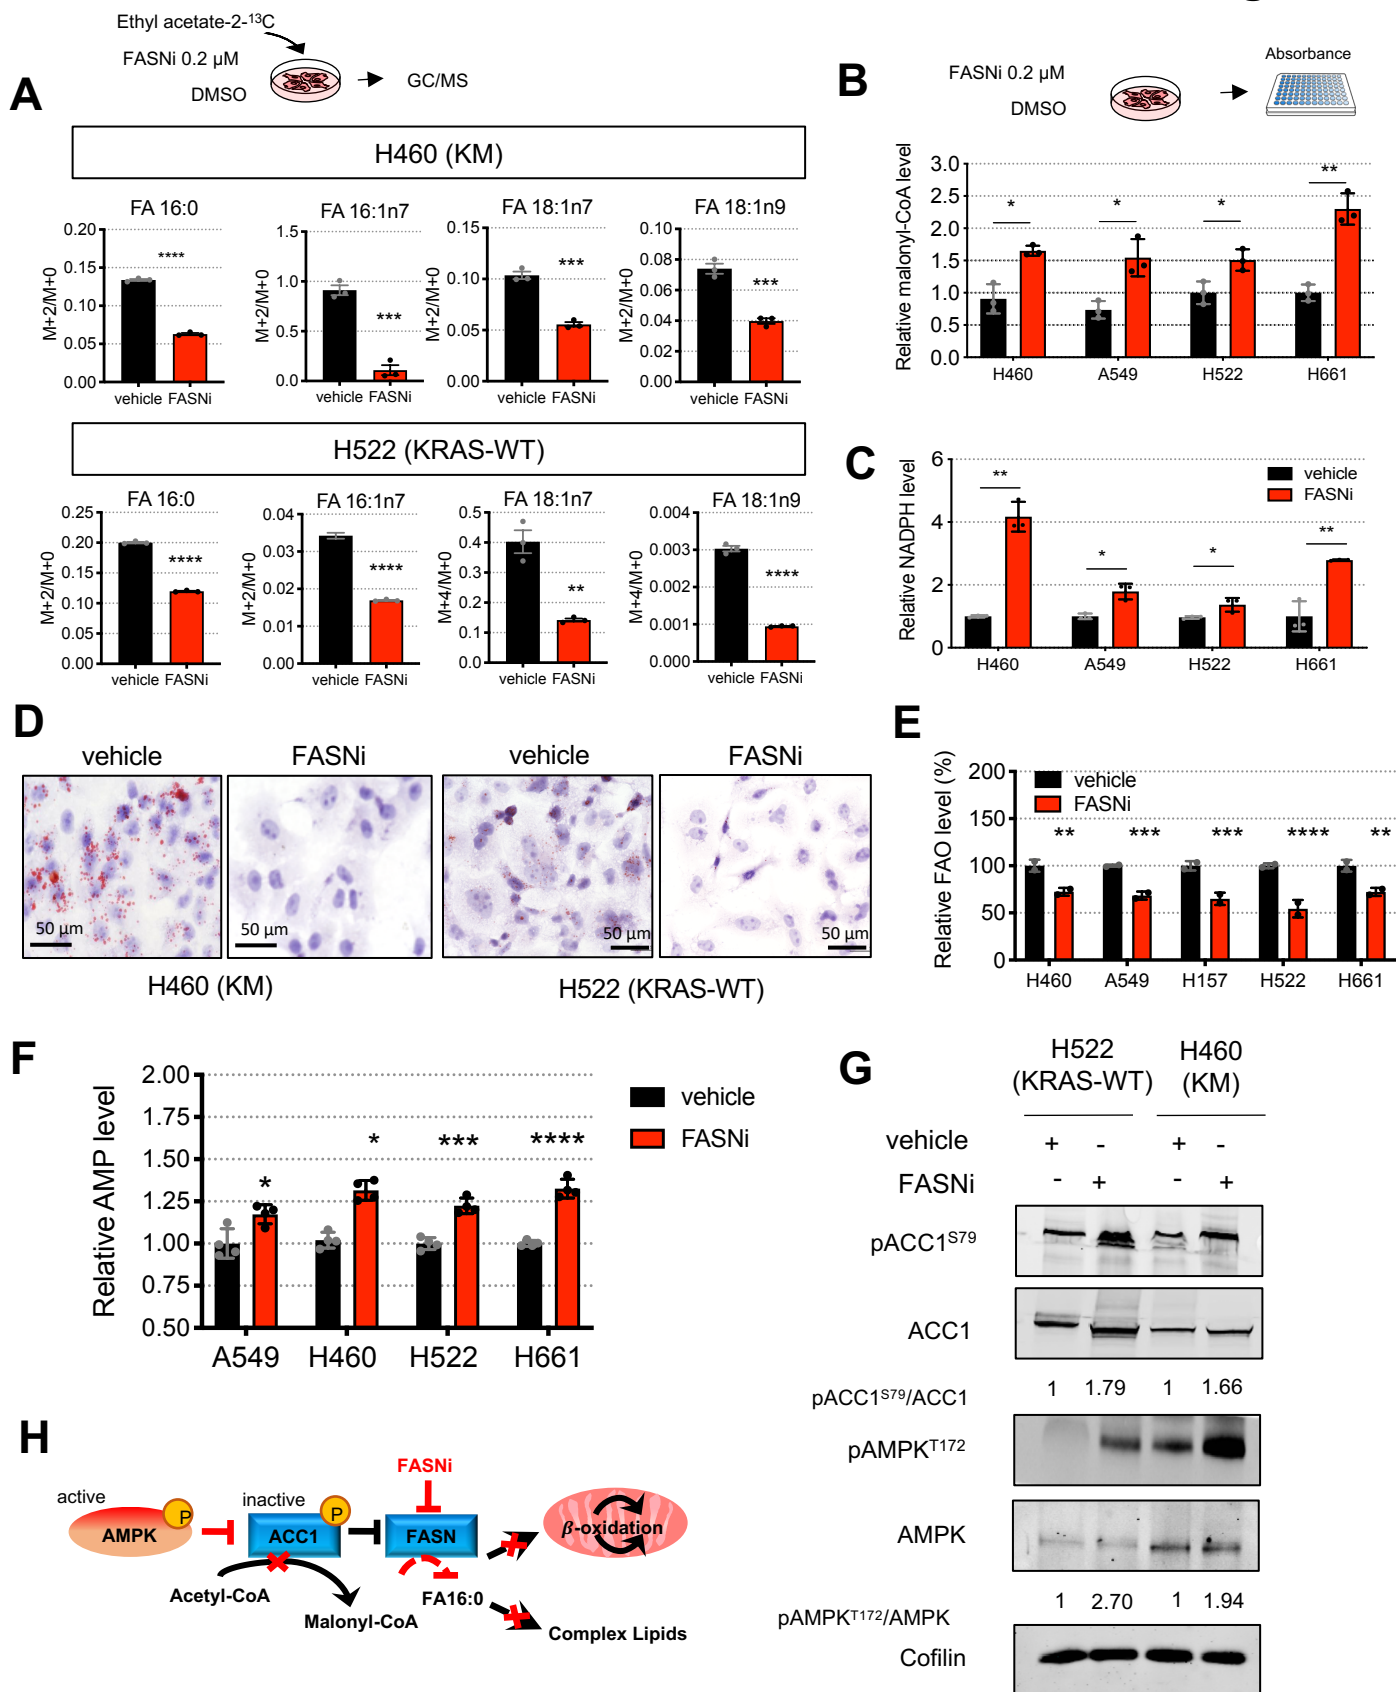

# Figure 4

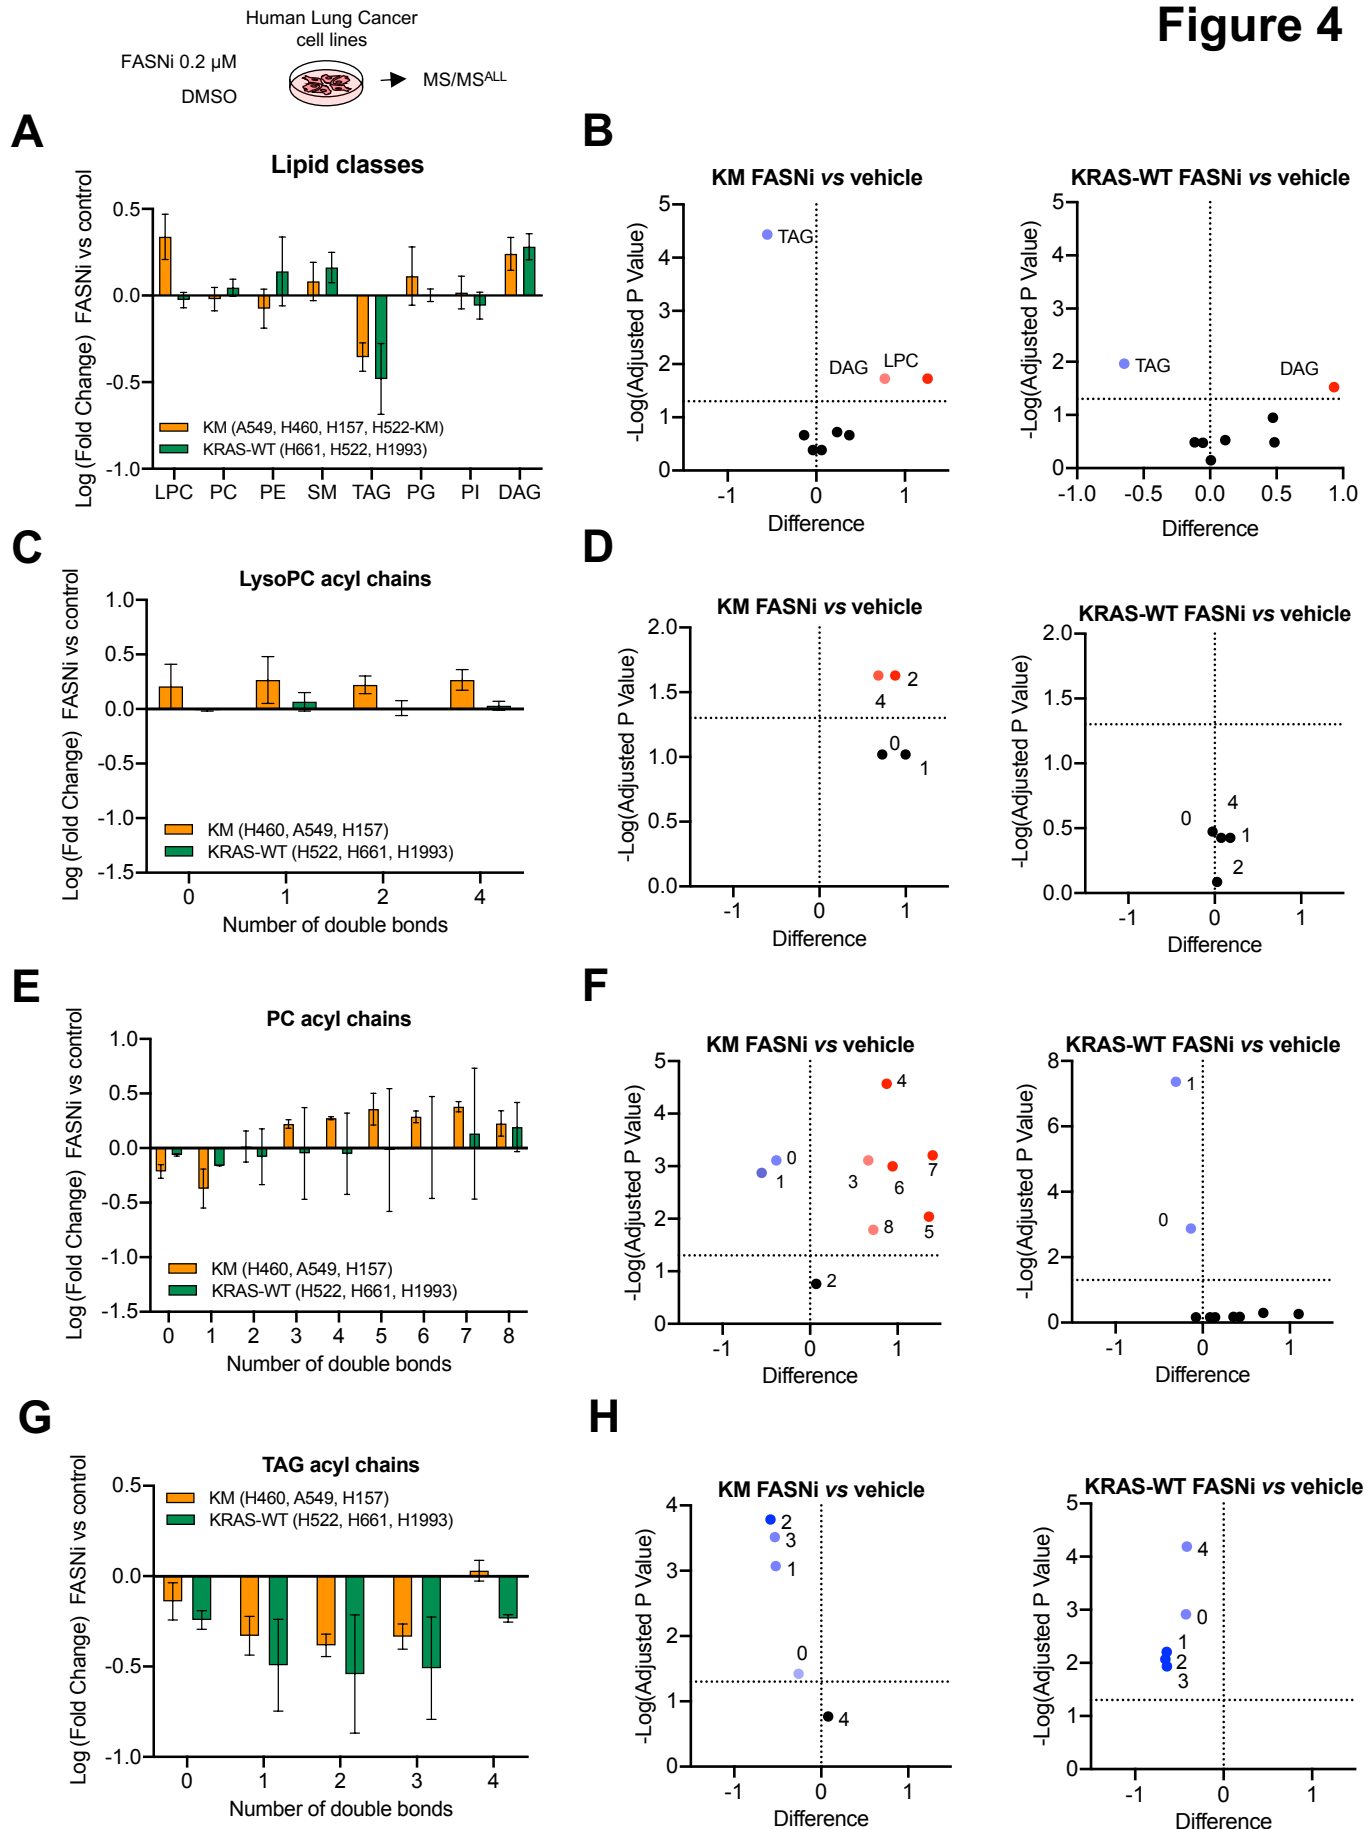

# Figure 5

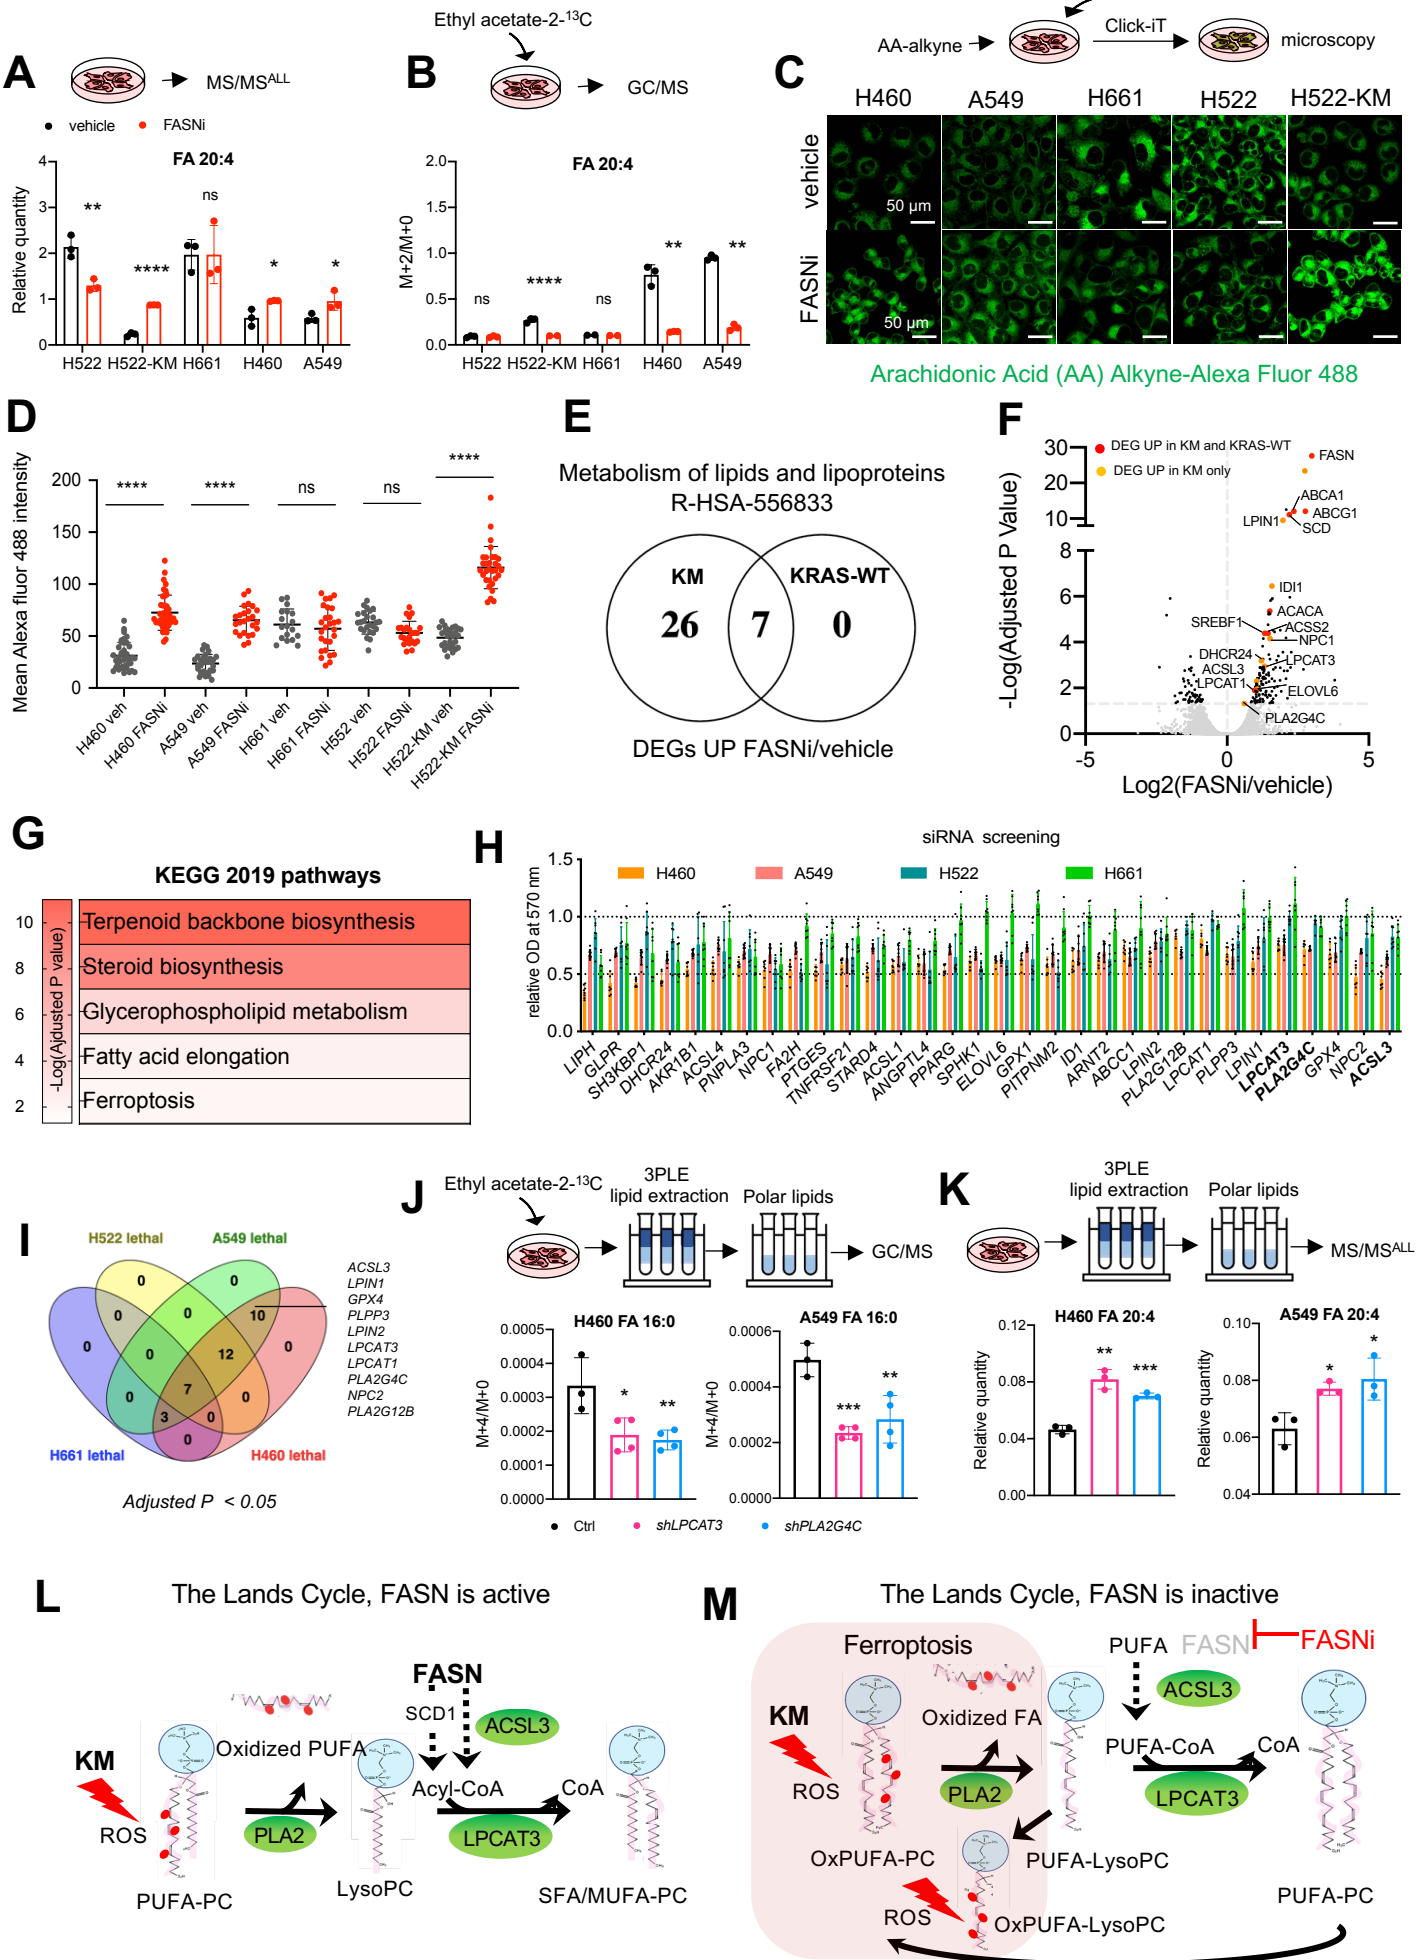

# Figure 6

FASNi 0.2  $\mu$ M  
DMSO  
C11-BODIPY  
30 min  
Microscopy  
Reduced  
Oxidized

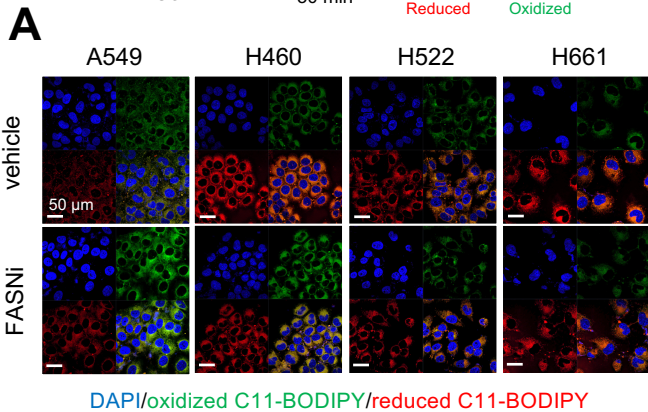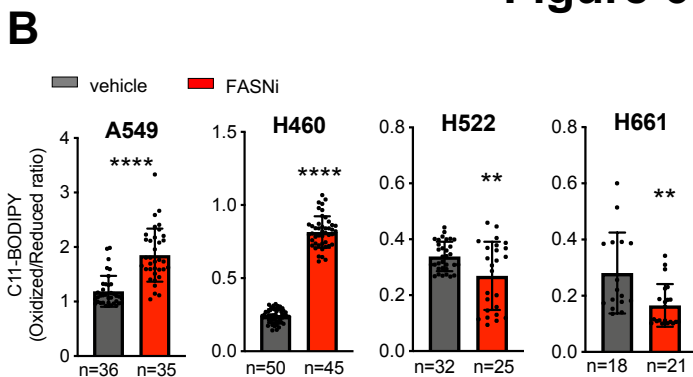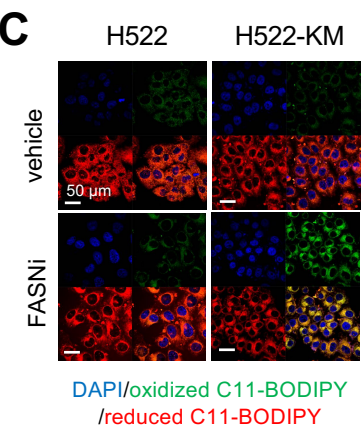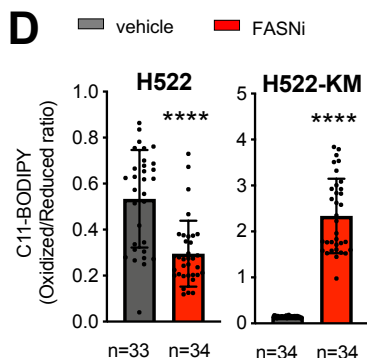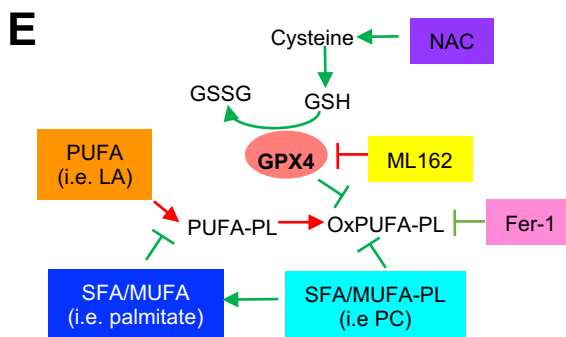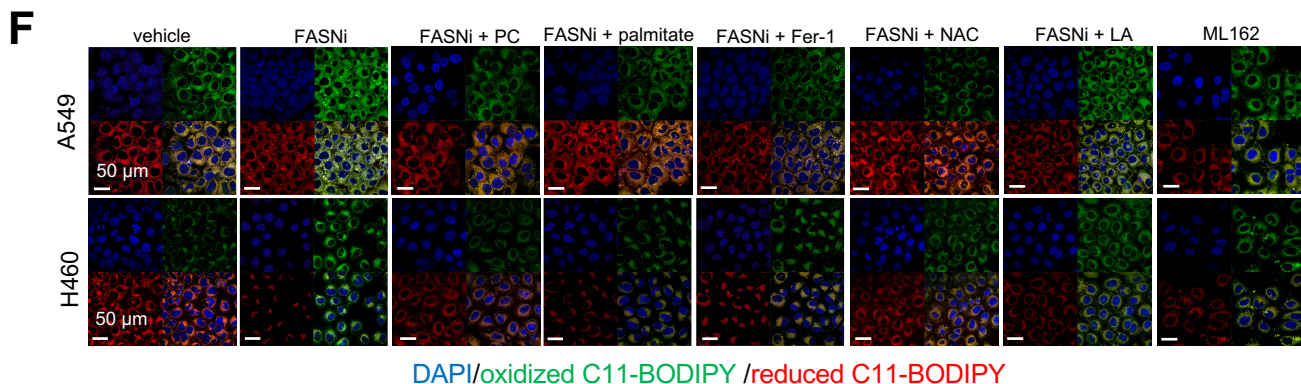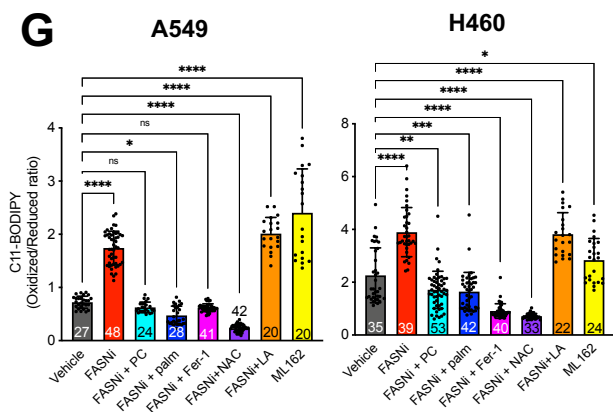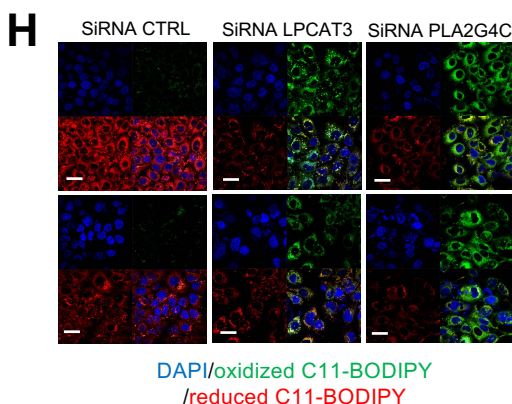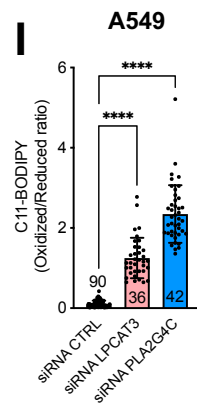

# Figure 7

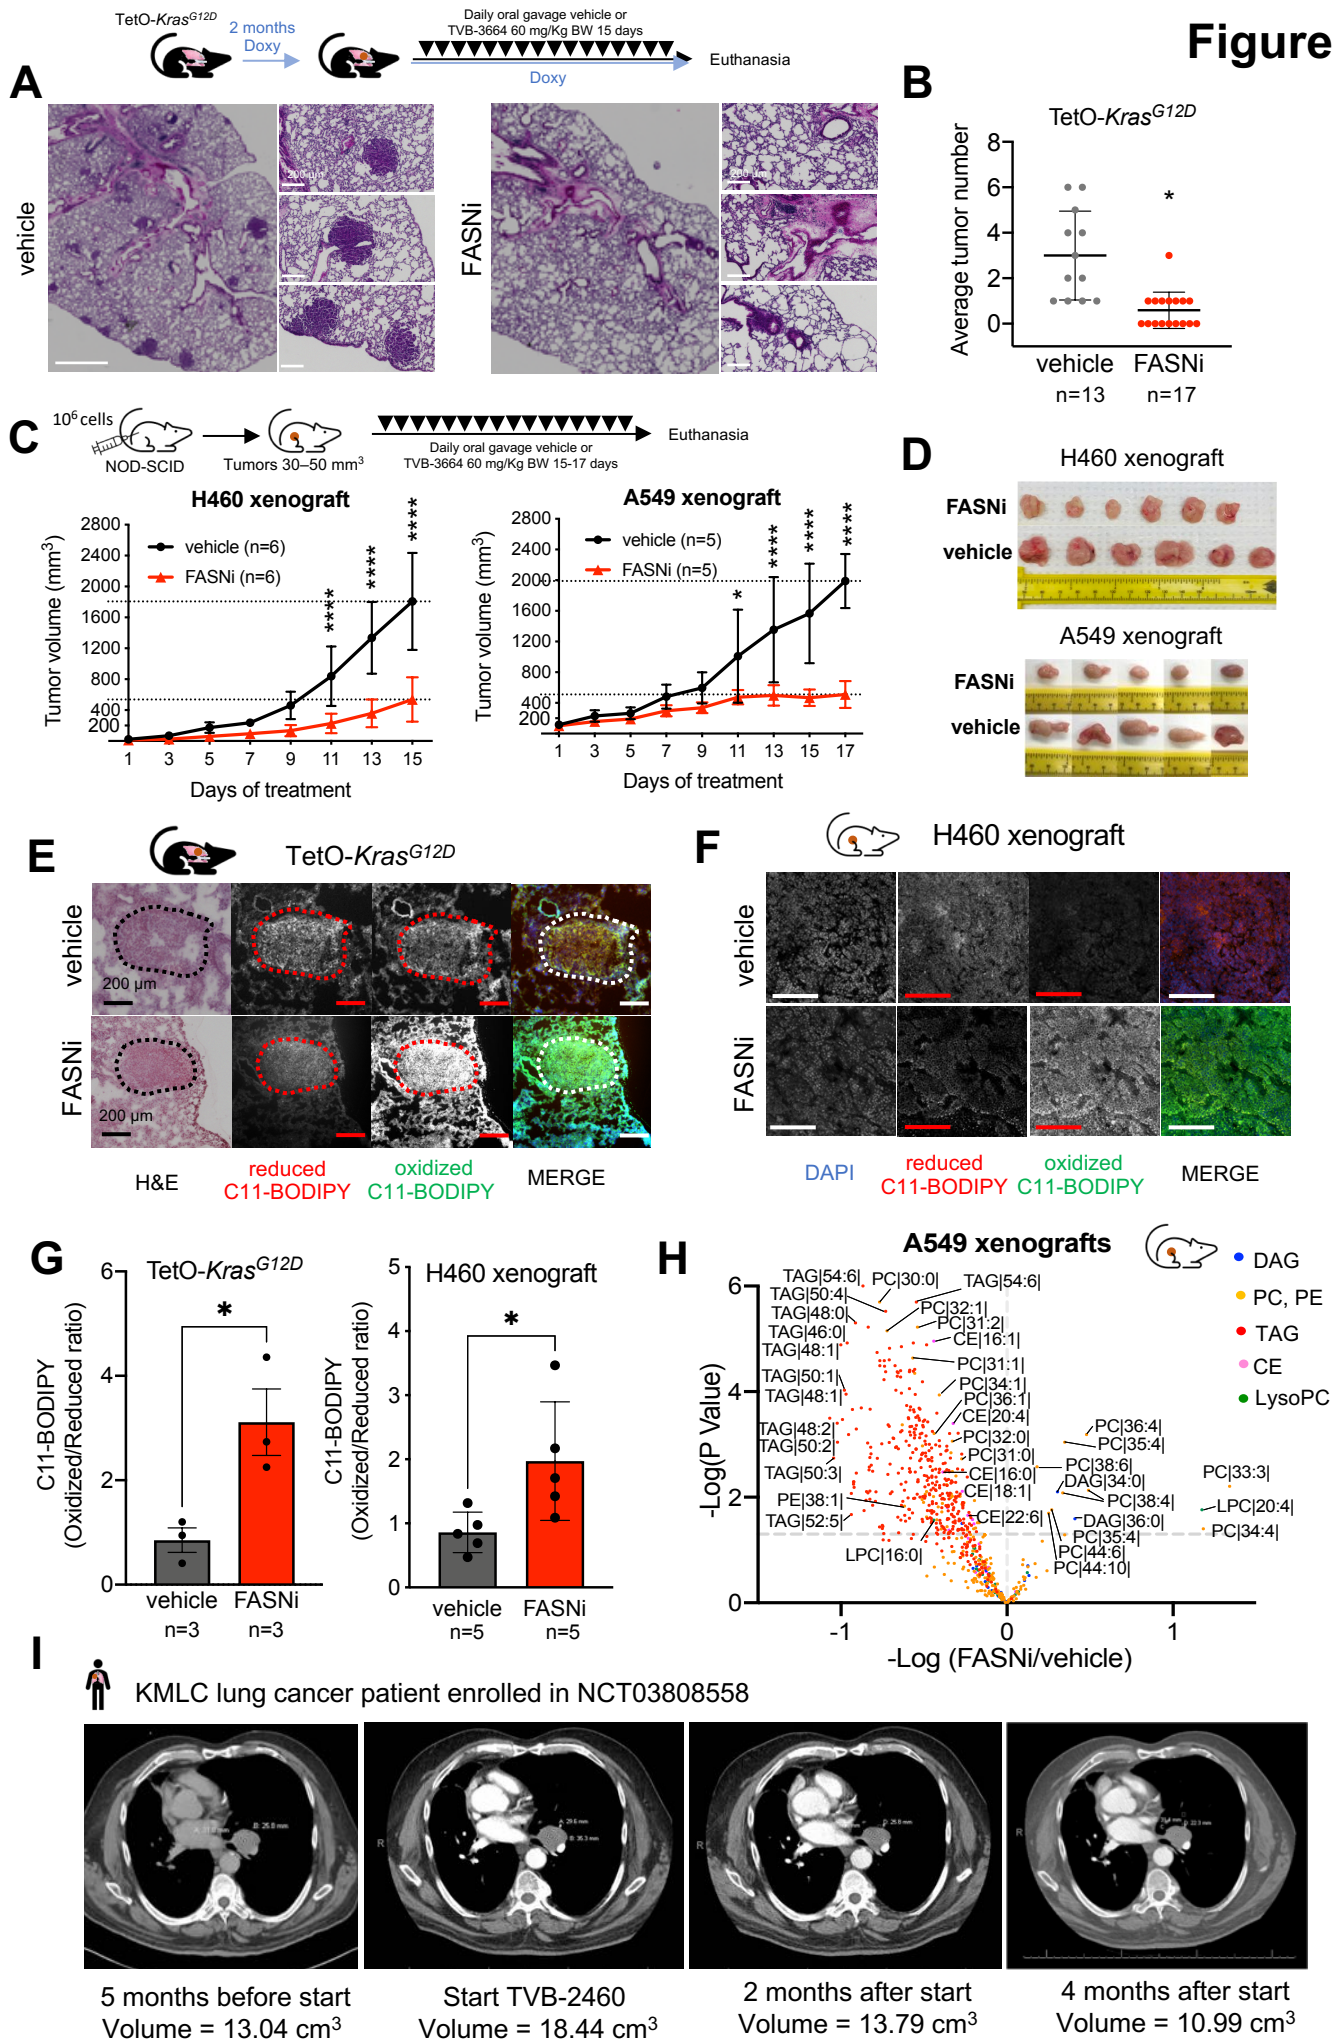

Source: https://www.biorxiv.org/content/10.1101/2021.03.18.434804v1.full.pdf
